# Supplementary material for: Copper (ii) dimers stabilized by bis(phenol) amine ligands: theoretical and experimental insights
Source: Royal Society of Chemistry journal article supplement (doi:10.1039/c8nj02591f), 2018-01-01
Supplement: c8nj02591f1.pdf [file c8nj02591f1.pdf]

Pages S1-S37

## Electronic Supporting Information

### **Copper (II) dimers stabilized by bis(phenol) amine ligands: Theoretical and Experimental Insights**

Amit Rajput,\* Akhilesh Kumar, Arunava Sengupta, Priyanka Tyagi, Himanshu Arora\*

.....

#### **Figures and Tables**

**Fig. S1** Absorption spectra of [<sup>1</sup>L<sub>2</sub>Cu<sup>II</sup>]<sub>2</sub> (**1**) in CH<sub>2</sub>Cl<sub>2</sub> solution.

**Fig. S2** Absorption spectra of [<sup>2</sup>L<sub>2</sub>Cu<sup>II</sup>]<sub>2</sub> (**1**) in CH<sub>2</sub>Cl<sub>2</sub> solution.

**Fig. S3** Spectral change of the titration of [<sup>3</sup>L<sub>2</sub>Cu<sup>II</sup>]<sub>2</sub> [**29**] ( $2.5 \times 10^{-4}$  M) by pyridine (0 – 0.004 M) in CH<sub>2</sub>Cl<sub>2</sub>. Inset: plot of  $(A - A_0)^2 / (A - A_\infty)$  vs. [pyridine]<sub>2</sub> for the titration.

**Fig. S4** Spectral change of the titration of [<sup>2</sup>L<sub>2</sub>Cu<sup>II</sup>]<sub>2</sub> ( $2.5 \times 10^{-4}$  M) by pyridine (0 – 0.004 M) in CH<sub>2</sub>Cl<sub>2</sub>. Inset: plot of  $(A - A_0)^2 / (A - A_\infty)$  vs. [pyridine]<sub>2</sub> for the titration.

**Fig. S5** ESR spectrum of [<sup>1</sup>L<sub>2</sub>Cu<sup>II</sup>]<sub>2</sub> (**1**) in CH<sub>2</sub>Cl<sub>2</sub> solution at 77 K; microwave frequency 9.448 GHz, modulation frequency 100 kHz, modulation amplitude 5 G, microwave power 6.36 mW.

**Fig. S6** ESR spectrum of [<sup>2</sup>LCu<sup>II</sup>(py)] generated from the dimer ( $10^{-3}$  M) by adding pyridine ( $1.6 \times 10^{-2}$  M) in CH<sub>2</sub>Cl<sub>2</sub> at 77 K; microwave frequency 9.448 GHz, modulation frequency 100 kHz, modulation amplitude 5 G, microwave power 6.36 mW. (C) The computer simulation spectrum with the parameters  $g_1 = 2.275$ ,  $g_2 = 2.070$ ,  $g_3 = 2.045$ ,  $A_1 = 160$ ,  $A_2 = 25$ , and  $A_3 = 18$  G (Cu, I = 3/2); and  $A_1 = A_2 = A_3 = 14$  G (N, I=1).

**Fig. S7** Cyclic voltammogram (100 mV/s) of a ~1.0 mM solution of (**2**) at a platinum electrode in CH<sub>3</sub>CN (0.1 M in TBAP).

**Fig. S8** (a) Spin-Density plot and (b) Magnetic orbitals for [<sup>1</sup>LCu<sup>II</sup>Py] (**4**) ( $M_s = \frac{1}{2}$ ).

**Fig. S9** (a) Spin-Density plot and (b) Magnetic orbitals for [<sup>2</sup>LCu<sup>II</sup>Py] (**5**) ( $M_s = \frac{1}{2}$ ).

**Fig. S10** TD-DFT calculated electronic spectra for [<sup>1</sup>L<sub>2</sub>Cu<sup>II</sup>]<sub>2</sub> (**1**).

**Fig. S11** Representative molecular-orbitals involved in TD-DFT transitions of [(<sup>1</sup>L)<sub>2</sub>Cu<sup>II</sup>]<sub>2</sub> (**1**).

**Fig. S12** TD-DFT calculated electronic spectra for [(<sup>2</sup>L)<sub>2</sub>Cu<sup>II</sup>]<sub>2</sub> (**2**).

**Fig. S13** Representative molecular-orbitals involved in TD-DFT transitions of  $[(^2L)_2Cu^{II}_2]$  (**2**).

**Fig. S14** TD-DFT calculated electronic spectra for  $[^1LCu^{II}Py]$  (**4**).

**Fig. S15** Representative molecular-orbitals involved in TD-DFT transitions of  $[^1LCu^{II}Py]$  (**4**).

**Fig. S16** TD-DFT calculated electronic spectra for  $[^2LCu^{II}Py]$  (**5**).

**Fig. S17** Representative molecular-orbitals involved in TD-DFT transitions of  $[^2LCu^{II}Py]$  (**5**).

**Table S1** TD-DFT-calculated electronic transitions of  $[(^1L)_2Cu^{II}_2]$  (**1**)

**Table S2** TD-DFT-calculated electronic transitions of  $[^2L_2Cu_2^{II}]$  (**2**)

**Table S3** TD-DFT calculated electronic transitions of  $[^1LCu^{II}Py]$  (**4**)

**Table S4** TD-DFT calculated electronic transitions of  $[^2LCu^{II}Py]$  (**5**)

**Table S5** DFT-optimized Cartesian coordinates of  $[(^1L)_2Cu_2^{II}]$  (**1**).

**Table S6** DFT-optimized Cartesian coordinates of  $[(^2L)_2Cu_2^{II}]$  (**2**)

**Table S7** DFT-optimized Cartesian coordinates of  $[^1L_2Cu^{II}Py]$  (**4**)

**Table S8** DFT-optimized Cartesian coordinates of  $[^2L_2Cu^{II}Py]$  (**5**)

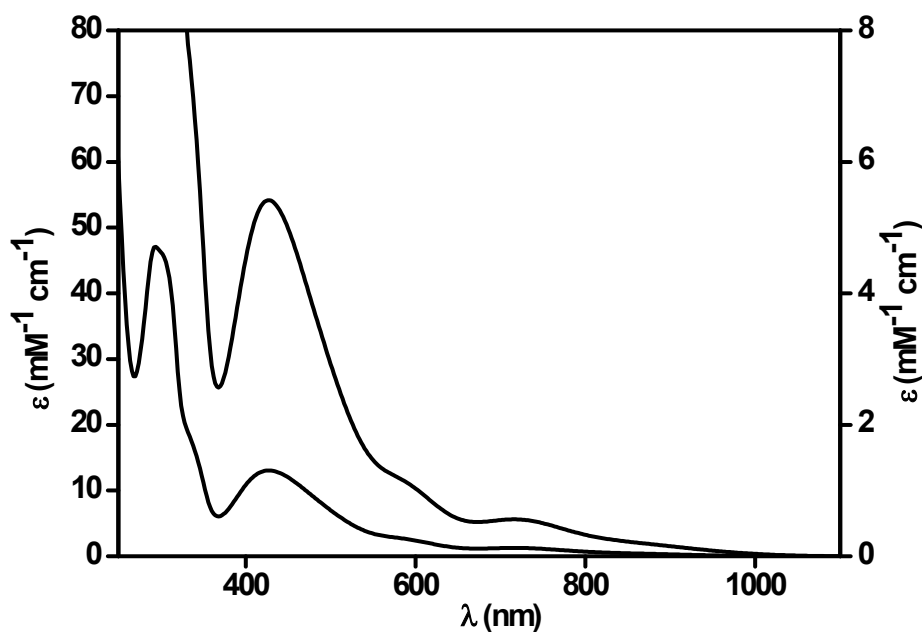

**Fig. S1.** Absorption spectra of  $[^1L_2Cu^{II}_2]$  (**1**) in  $CH_2Cl_2$  solution.

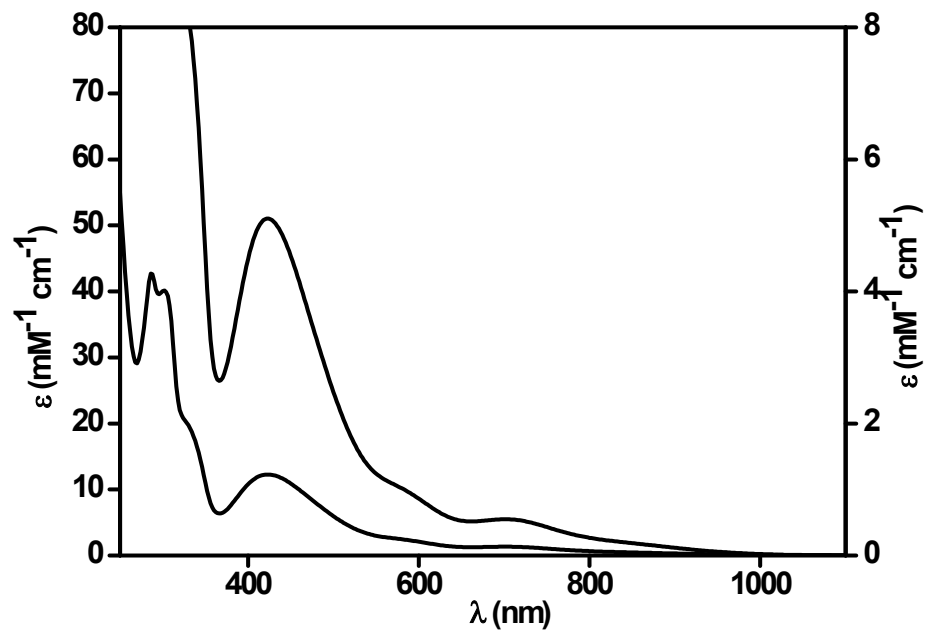

Fig. S2. Absorption spectra of  $[^2L_2Cu^{II}_2]$  (**2**) in  $CH_2Cl_2$  solution.

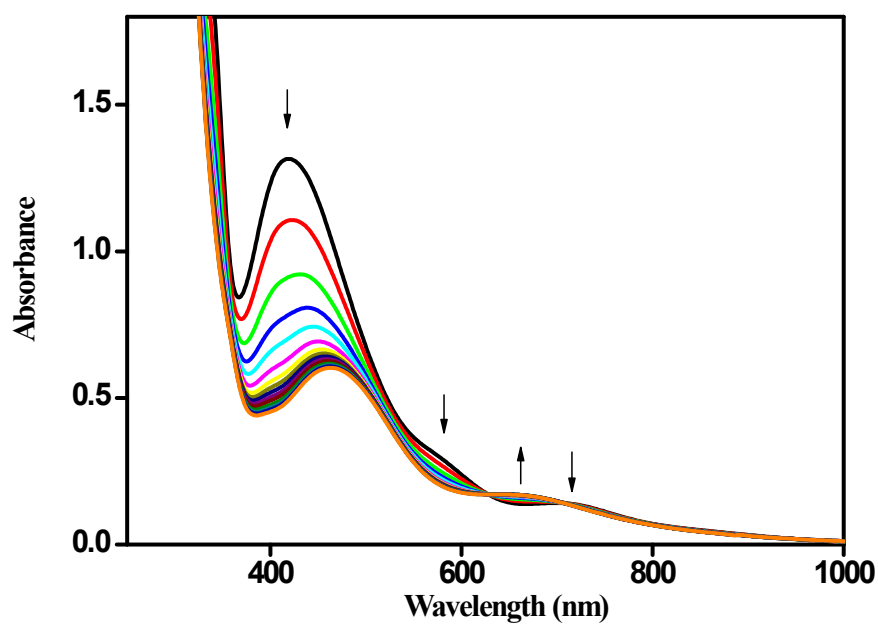

Fig. S3. Spectral change of the titration of  $[^3L_2Cu^{II}_2]$  [**29**] ( $2.5 \times 10^{-4}$  M) by pyridine (0 – 0.004 M) in  $CH_3CN$ . Inset: plot of  $(A - A_0)^2 / (A - A_\infty)$  vs.  $[pyridine]_2$  for the titration.

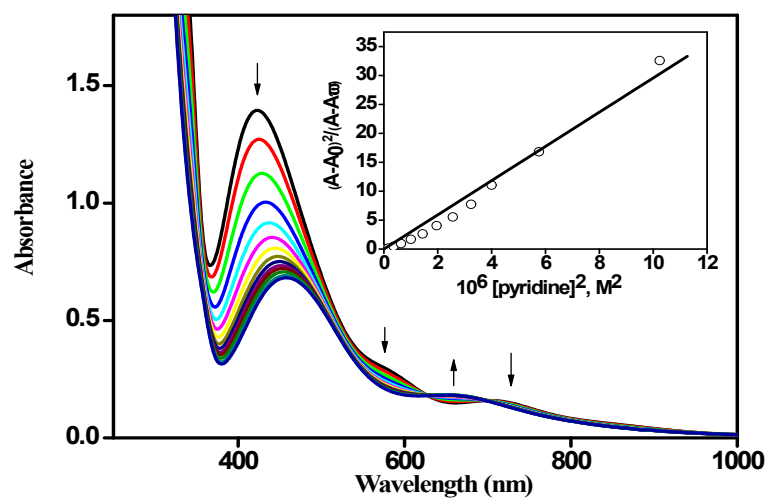

**Fig. S4.** Spectral change of the titration of  $[^2L_2Cu^{II}_2]$  ( $2.5 \times 10^{-4}$  M) by pyridine (0 – 0.004 M) in  $CH_2Cl_2$ . Inset: plot of  $(A - A_0)^2 / (A - A_\infty)$  vs.  $[pyridine]_2$  for the titration.

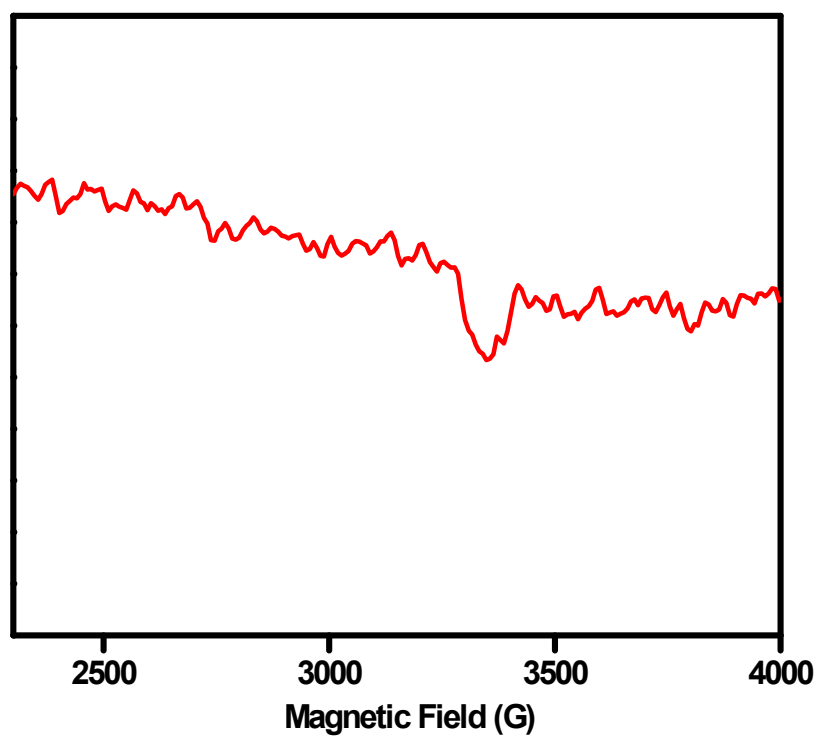

**Fig. S5** ESR spectrum of  $[^1L_2Cu^{II}_2]$  (**1**) in  $CH_2Cl_2$  solution at 77 K; microwave frequency 9.448 GHz, modulation frequency 100 kHz, modulation amplitude 5 G, microwave power 6.36 mW.

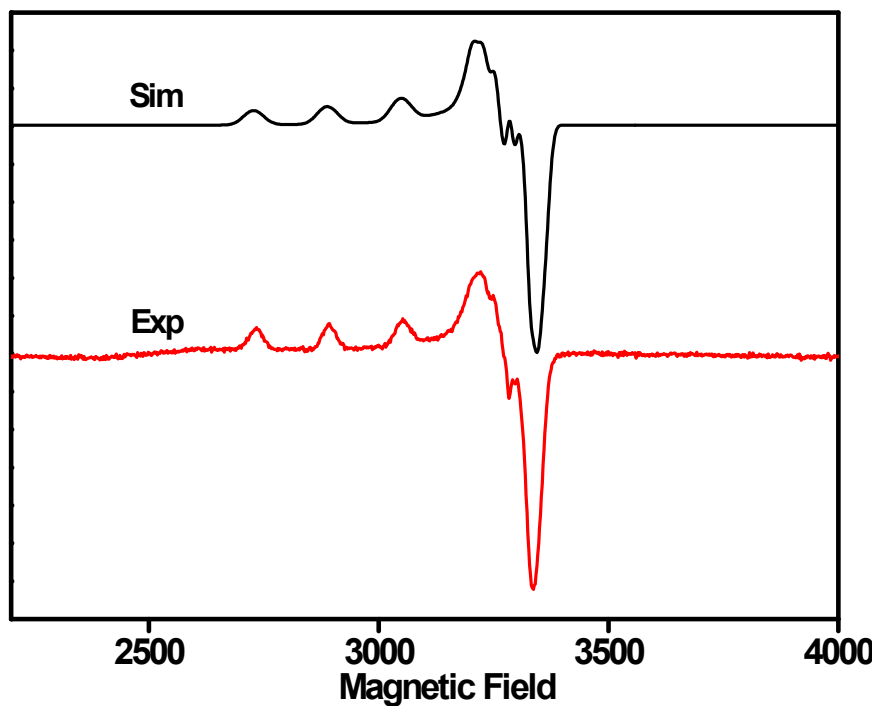

**Fig. S6.** ESR spectrum of  $[^2\text{LCu}^{\text{II}}(\text{py})]$  generated from the dimer ( $10^{-3}$  M) by adding pyridine ( $1.6 \times 10^{-2}$  M) in  $\text{CH}_2\text{Cl}_2$  at 77 K; microwave frequency 9.448 GHz, modulation frequency 100 kHz, modulation amplitude 5 G, microwave power 6.36 mW. (C) The computer simulation spectrum with the parameters  $g_1 = 2.275$ ,  $g_2 = 2.070$ ,  $g_3 = 2.045$ ,  $A_1 = 160$ ,  $A_2 = 25$ , and  $A_3 = 18$  G (Cu,  $I = 3/2$ ); and  $A_1 = A_2 = A_3 = 14$  G (N,  $I = 1$ ).

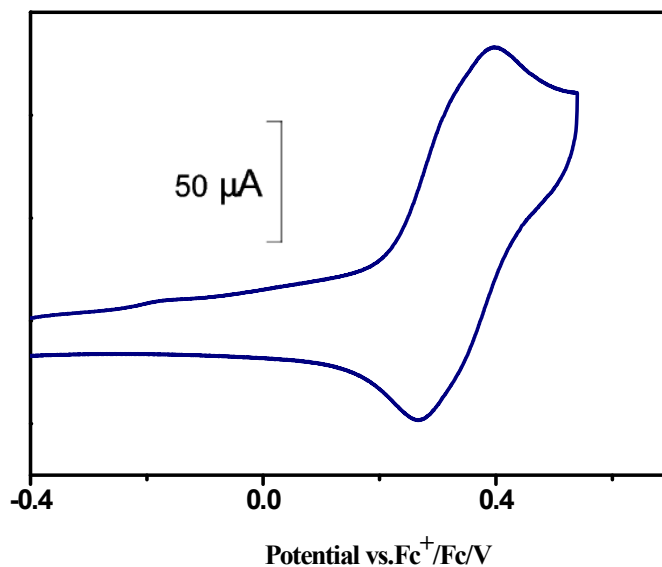

**Fig. S7.** Cyclic voltammogram (100 mV/s) of a  $\sim 1.0$  mM solution of (2) at a platinum electrode in  $\text{CH}_3\text{CN}$  (0.1 M in TBAP).

(a)

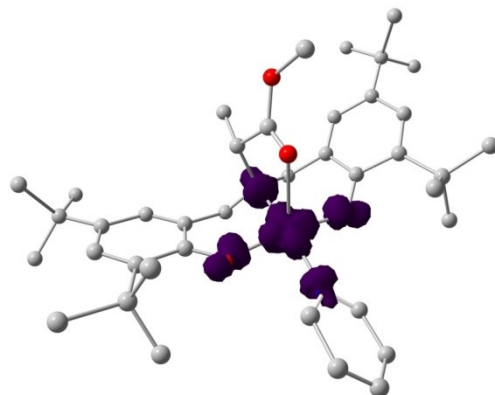

(b)

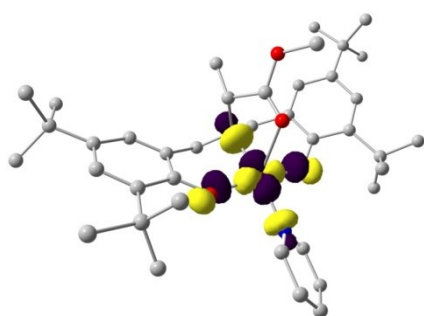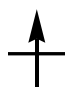

54.6% Cu SOMO

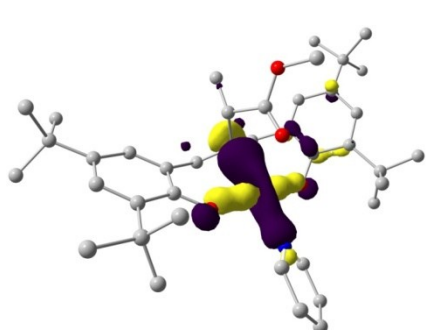55.6% Cu  $\alpha$ -HOMO-1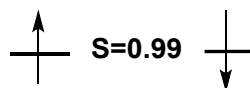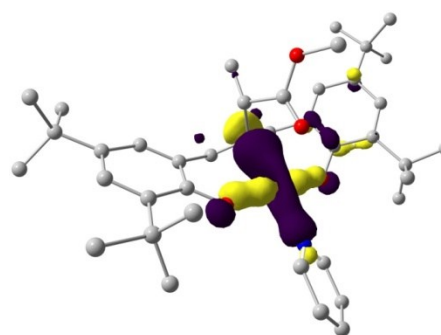 $\beta$ -HOMO 55.6% Cu

Fig. S8. (a) Spin-Density plot and (b) Magnetic orbitals for  $[^1\text{LCu}^{\text{II}}\text{Py}]$  (**4**) ( $M_s = \frac{1}{2}$ ).

(a)

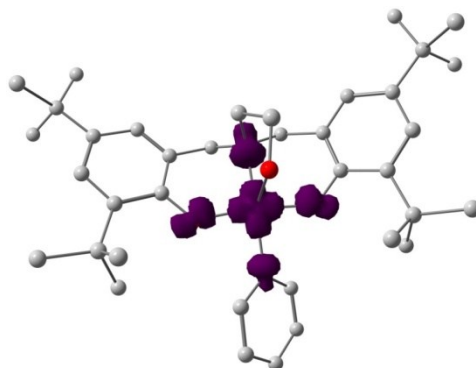

(b)

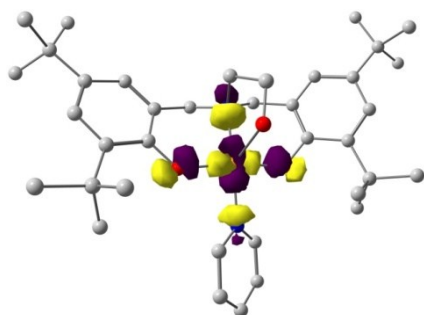

54.64% Cu SOMO

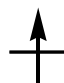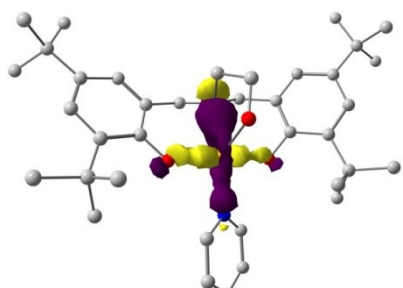

$\alpha$ -HOMO-1

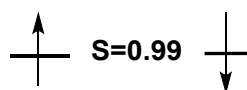

S=0.99

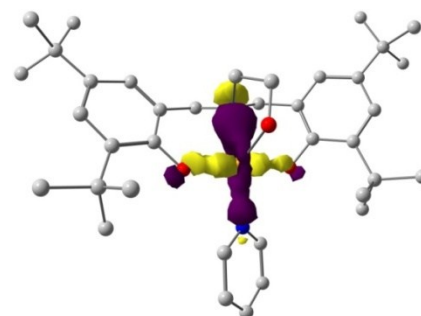

$\beta$ -HOMO

**Fig. S9.** (a) Spin-Density plot and (b) Magnetic orbitals for  $[^2\text{LCu}^{\text{II}}\text{Py}]$  (**5**) ( $M_s = \frac{1}{2}$ ).

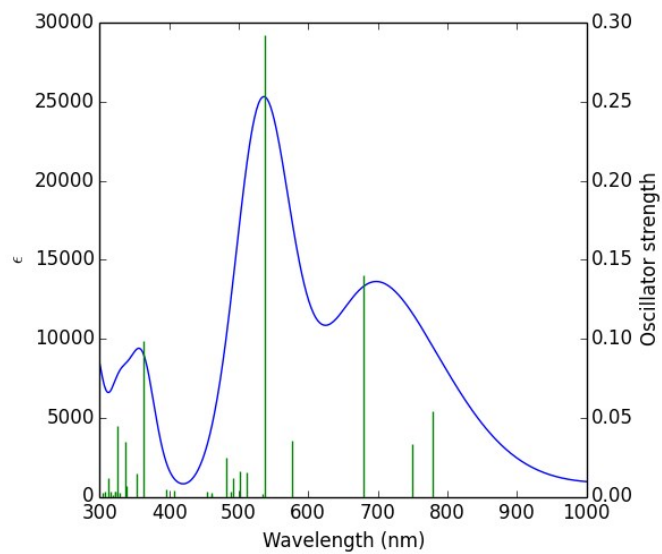

**Fig. S10.** TD-DFT calculated electronic spectra for  $[1L_2Cu^{II}_2]$  (1).

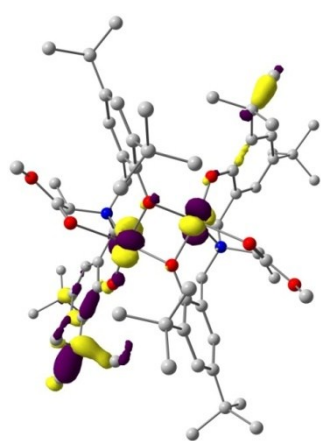

**Homo-19 ( $\alpha/\beta$ )**

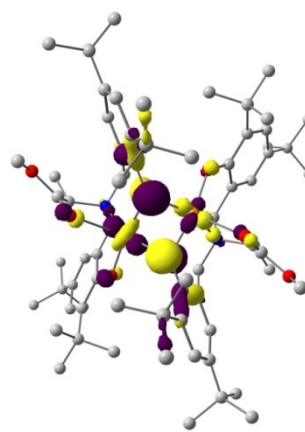

**Homo-16 ( $\alpha/\beta$ )**

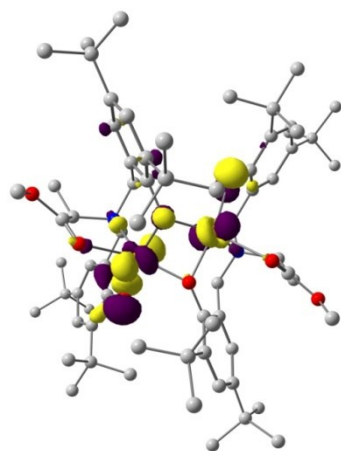

**Homo-11 ( $\alpha/\beta$ )**

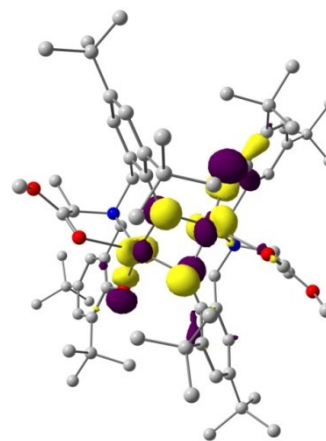

**Homo-8 ( $\alpha/\beta$ )**



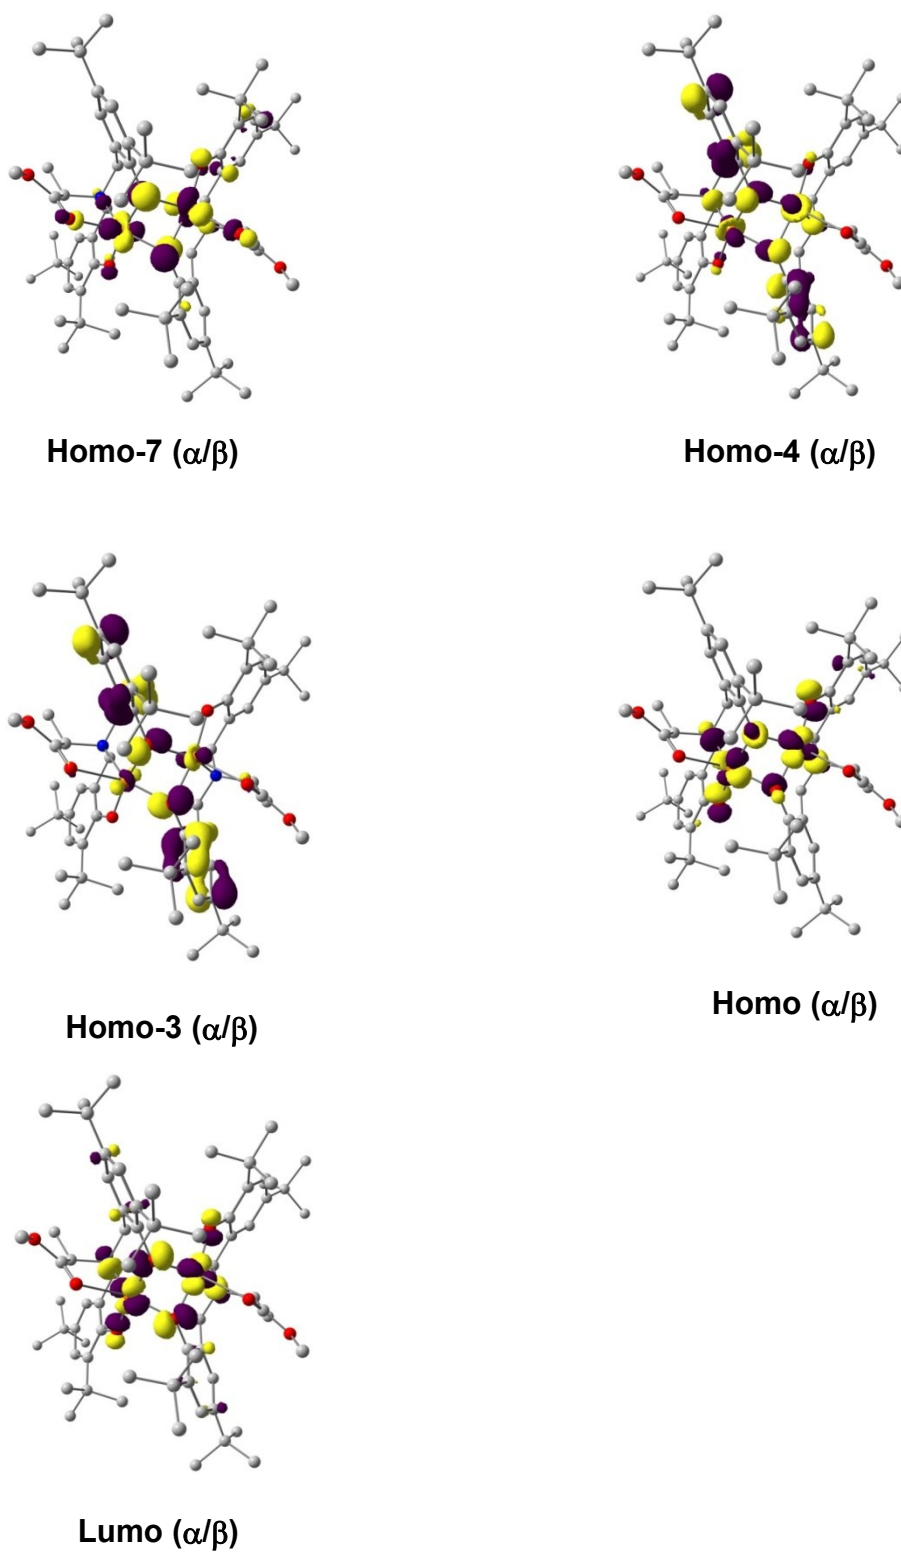

**Fig. S11.** Representative molecular-orbitals involved in TD-DFT transitions of  $[(^1L)_2Cu^{II}_2]$  (**1**).

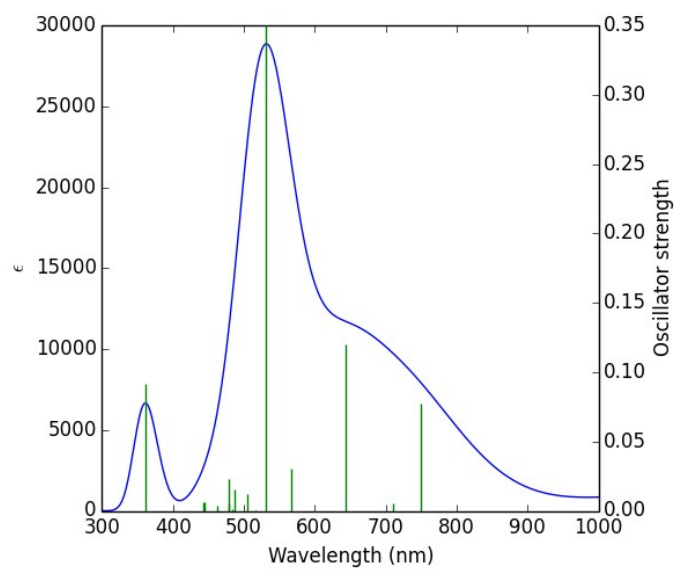

**Fig. S12.** TD-DFT calculated electronic spectra for  $[(^2L)_2Cu^{II}_2]$  (**2**).

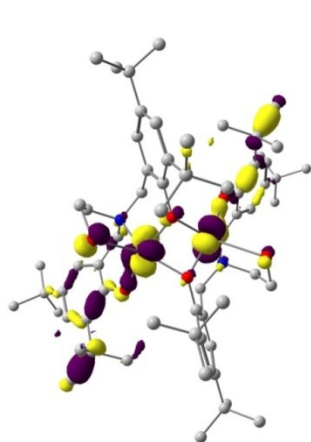

**Homo-20 ( $\alpha/\beta$ )**

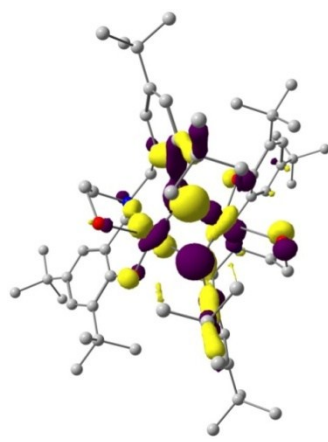

**Homo-17 ( $\alpha/\beta$ )**

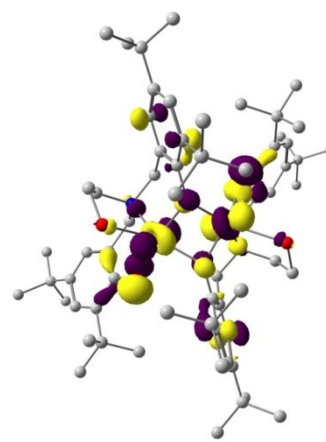

**Homo-11 ( $\alpha/\beta$ )**

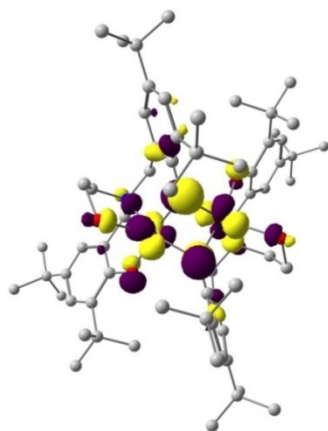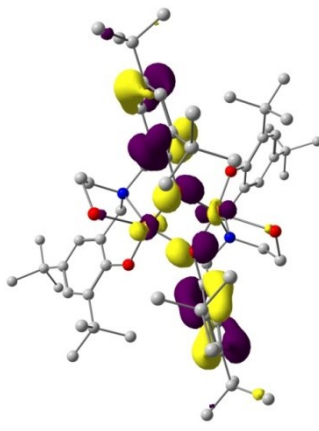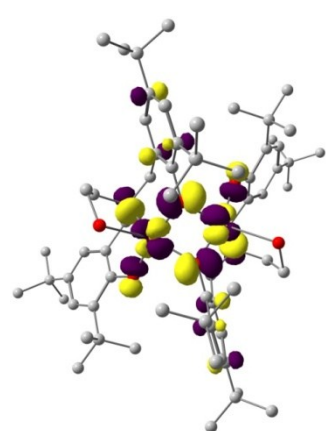

**Homo-7 ( $\alpha/\beta$ )****Homo-3 ( $\alpha/\beta$ )****LUMO ( $\alpha/\beta$ )****Fig. S13.** Representative molecular-orbitals involved in TD-DFT transitions of  $[(^2L)_2Cu^{II}_2]$  (**2**).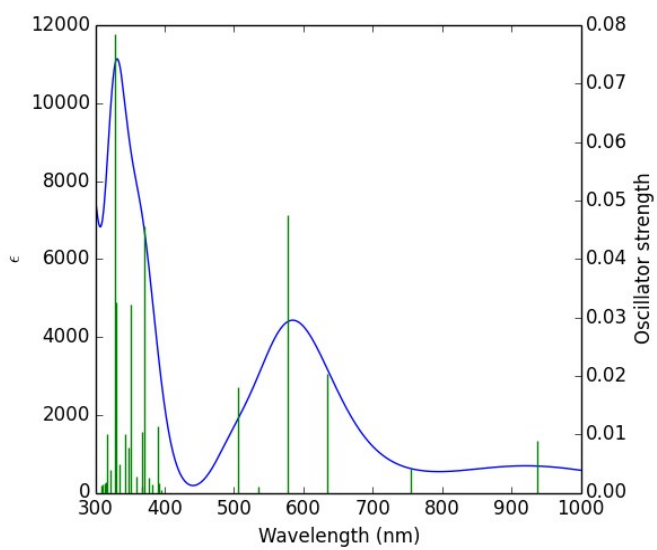**Fig. S14.** TD-DFT calculated electronic spectra for  $[^1LCu^{II}Py]$  (**4**).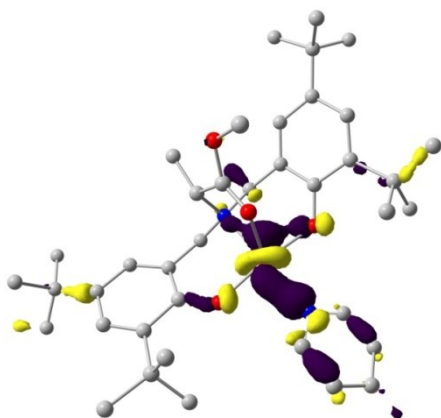**Homo-28 ( $\beta$ )**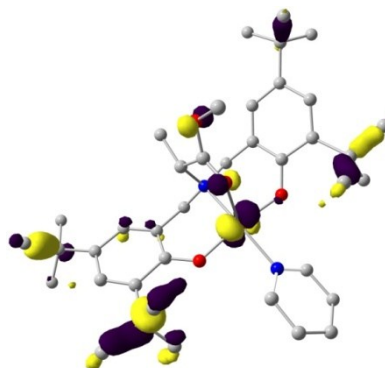**Homo-17 ( $\beta$ )**

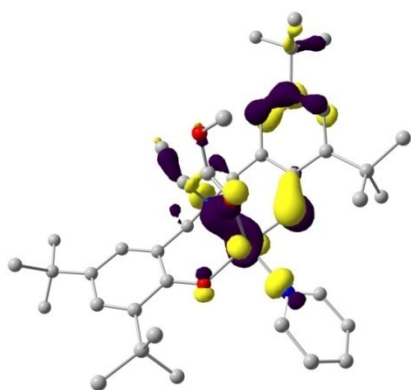

Homo-9 ( $\beta$ )

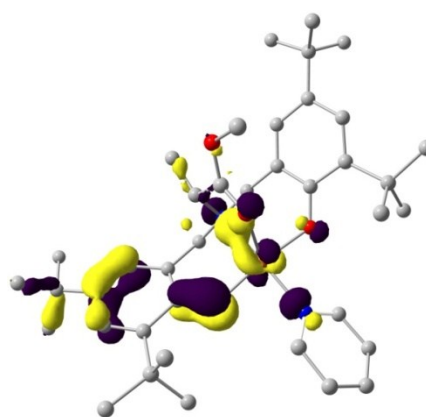

Homo-8 ( $\beta$ )

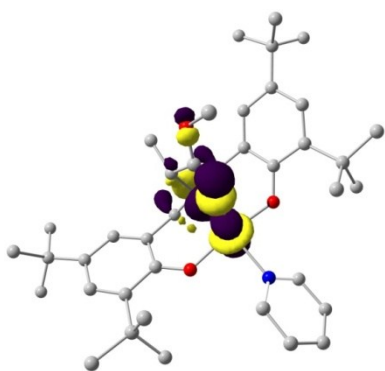

Homo-28 ( $\beta$ )

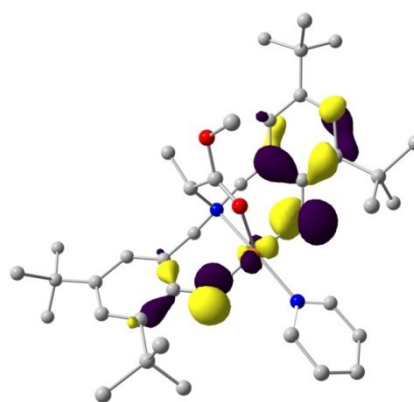

Homo-3 ( $\beta$ )

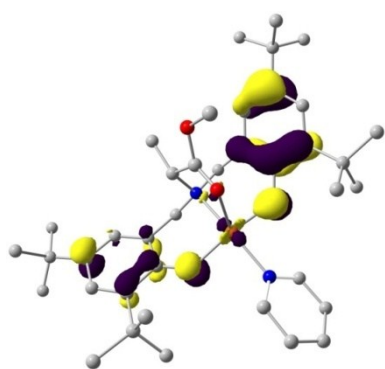

Homo-1 ( $\beta$ )

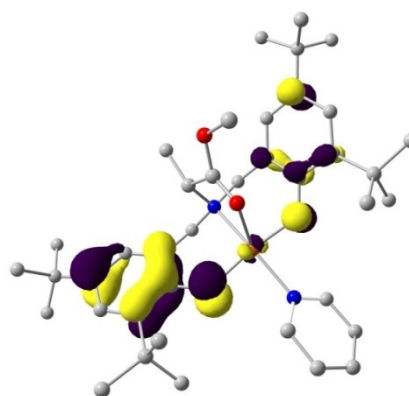

Homo ( $\beta$ )

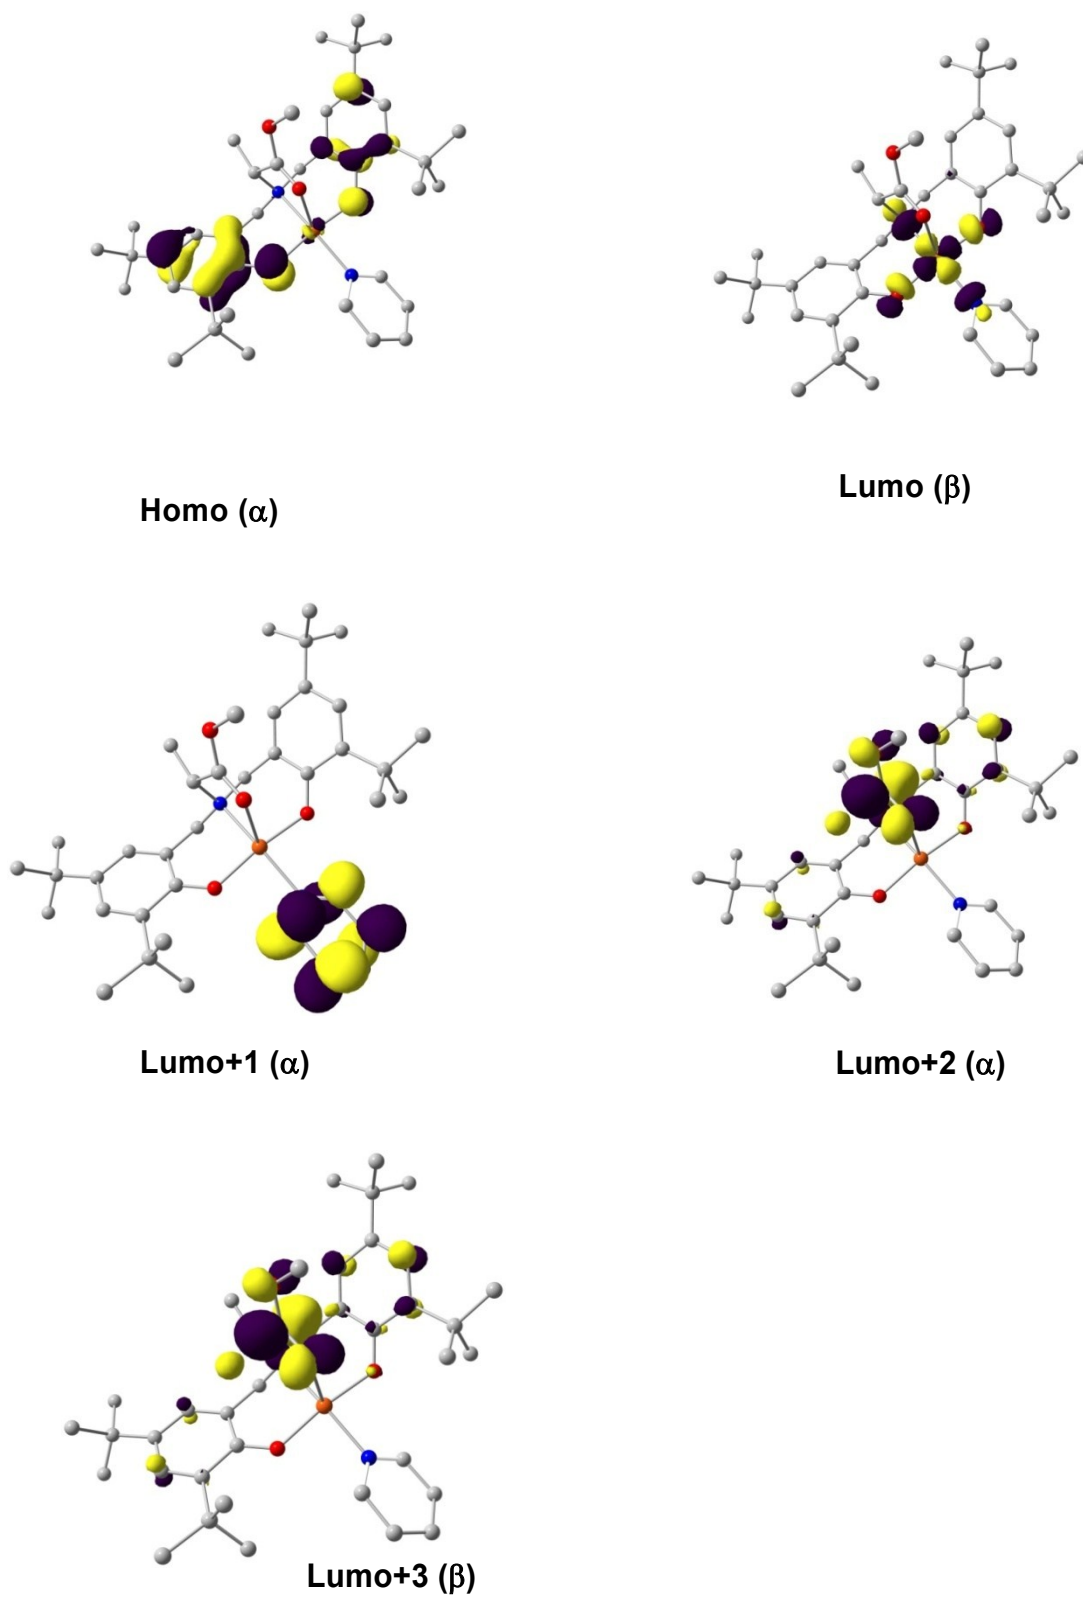

Fig. S15. Representative molecular-orbitals involved in TD-DFT transitions of [<sup>1</sup>LCu<sup>II</sup>Py] (4).

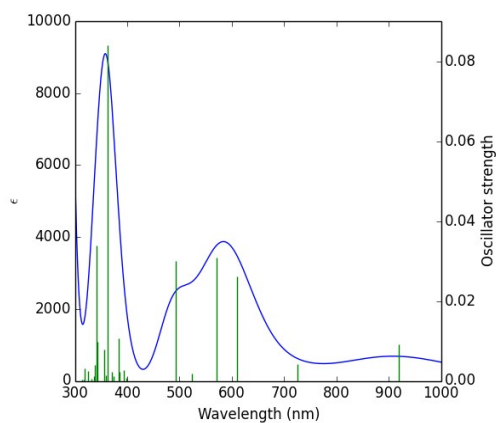

**Fig. S16.** TD-DFT calculated electronic spectra for  $[^2\text{LCu}^{\text{II}}\text{Py}]$  (**5**).

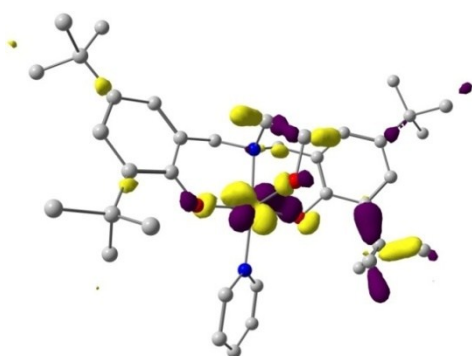

**Homo-28 ( $\beta$ )**

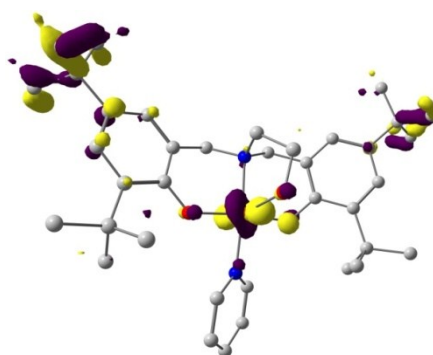

**Homo-26 ( $\beta$ )**

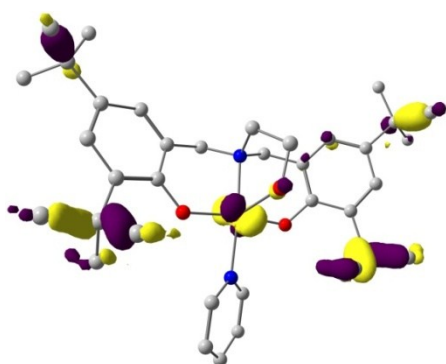

**Homo-17 ( $\beta$ )**

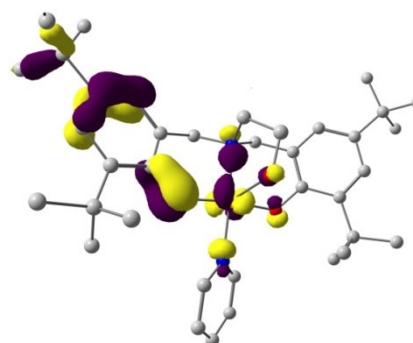

**Homo-8 ( $\beta$ )**

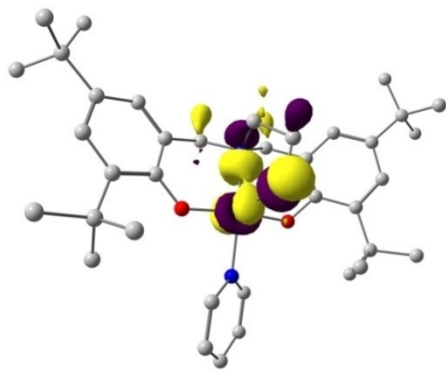**Homo-6 ( $\beta$ )**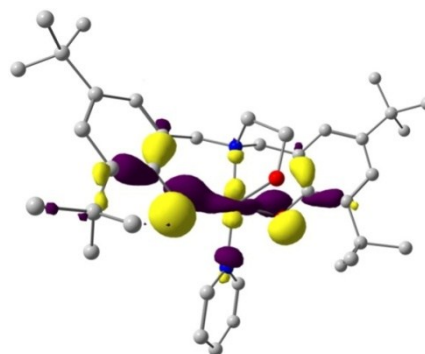**Homo-5 ( $\beta$ )**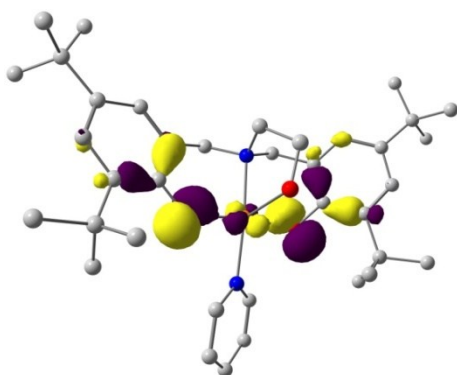**Homo-4 ( $\beta$ )**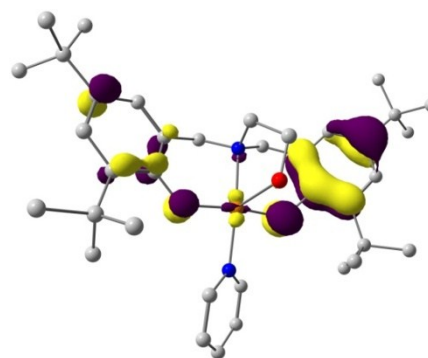**Homo-1 ( $\beta$ )**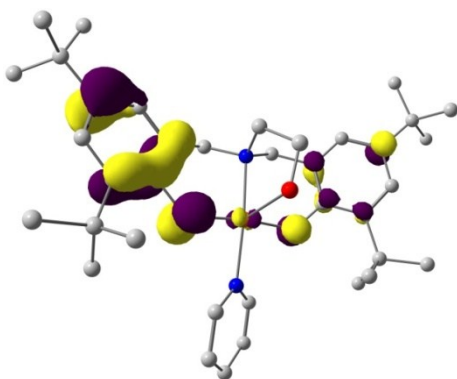**Homo ( $\beta$ )**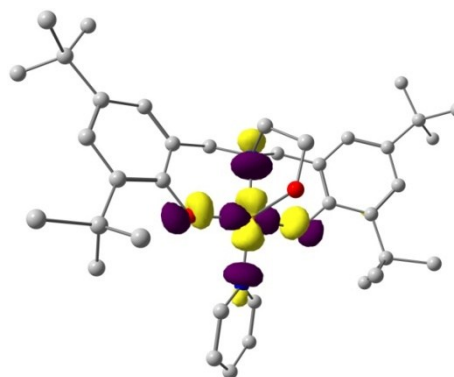**LUMO ( $\beta$ )**

**Fig. S17.** Representative molecular-orbitals involved in TD-DFT transitions of  $[^2\text{LCu}^{\text{II}}\text{Py}]$  (**5**).

Table S1 TD-DFT-calculated electronic transitions of [(<sup>1</sup>L)<sub>2</sub>Cu<sup>II</sup>]<sub>2</sub> (**1**)

| Excitation energy (eV) | $\lambda$ (nm) | $F$    | Transition                                                 | Character                                                                                                                                                                            |
|------------------------|----------------|--------|------------------------------------------------------------|--------------------------------------------------------------------------------------------------------------------------------------------------------------------------------------|
| 1.5901                 | 779            | 0.0543 | $\alpha/\beta$ -H-8[~72%L]→ $\alpha/\beta$ -L[~60%L] (14%) | Intra ligand Charge Transfer involving phenolate oxygen→amine through Metal                                                                                                          |
|                        |                |        | $\alpha/\beta$ -H-7[~59%L]→ $\alpha/\beta$ -L[~60%L] (14%) | MLCT involving Metal → amine                                                                                                                                                         |
|                        |                |        | $\alpha/\beta$ -H-4[~87%L]→ $\alpha/\beta$ -L[~60%L] (18%) | Intraligand Charge transfer involving <i>tert</i> -butylphenol ring→other phenolate oxygen and amine and LMCT involving <i>tert</i> -butylphenol ring → Metal                        |
|                        |                |        | $\alpha/\beta$ -H-3[~87%L]→ $\alpha/\beta$ -L[~60%L] (37%) | LMCT involving one <i>tert</i> -butyl phenol ring→Metal and intraligand charge transfer involving one <i>tert</i> -butyl phenol ring→amine and other phenolate oxygen through metal  |
| 1.8266                 | 678            | 0.1399 | $\alpha/\beta$ -H-7[~59%L]→ $\alpha/\beta$ -L[~60%L] (50%) | MLCT involving Metal → amine                                                                                                                                                         |
|                        |                |        | $\alpha/\beta$ -H-3[~87%L]→ $\alpha/\beta$ -L[~60%L] (23%) | LMCT involving one <i>tert</i> -butyl phenol ring→ Metal and intraligand charge transfer involving one <i>tert</i> -butyl phenol ring→amine and other phenolate oxygen through metal |
|                        |                |        | $\alpha/\beta$ -H[~59%L]→ $\alpha/\beta$ -L[~60%L] (12%)   | Intra ligand charge transfer between one bridged phenolate oxygen →other bridged                                                                                                     |
| 2.3053                 | 537            | 0.2918 | $\alpha/\beta$ -H-11[~60%L]→                               | MLCT involving Metal→ bridged                                                                                                                                                        |



|        |     |        |                                                                     |                                                                                                                                                                                          |
|--------|-----|--------|---------------------------------------------------------------------|------------------------------------------------------------------------------------------------------------------------------------------------------------------------------------------|
|        |     |        | $\alpha/\beta$ -L[~60%L] (57%)                                      | phenolate oxygen                                                                                                                                                                         |
|        |     |        | $\alpha/\beta$ -H-<br>3[~87%L]→ $\alpha/\beta$ -<br>L[~60%L] (23%)  | LMCT involving <i>tert</i> -<br>butylphenolring→Metal and intra-<br>ligand charge transfer involving <i>tert</i> -<br>butylphenolring→amine and other phenolate oxyg<br>en through metal |
| 3.4105 | 363 | 0.0987 | $\alpha/\beta$ -H-19[~62%L]→<br>$\alpha/\beta$ -L[~60%L] (28%)      | Intra-ligand charge transfer involving <i>tert</i> -butyl<br>moieties→ phenolate oxygen, bridged<br>phenolate oxygen and amine through Metal                                             |
|        |     |        | $\alpha/\beta$ -H-<br>16[~78%L]→ $\alpha/\beta$ -<br>L[~60%L] (54%) | LMCT involving bridged phenolate<br>oxygen→Metal and Intra-ligand charge transfer<br>involving bridged phenolate → other<br>phenolate moieties                                           |

Table S2TD-DFT-calculated electronic transitions of [ $^2L_2Cu_2^{II}$ ] (**2**)

| Excitation energy (eV) | $\lambda$ (nm) | $F$    | Transition                                                                                                                                                      | Character                                                                                                                                                                                                                                |
|------------------------|----------------|--------|-----------------------------------------------------------------------------------------------------------------------------------------------------------------|------------------------------------------------------------------------------------------------------------------------------------------------------------------------------------------------------------------------------------------|
| 1.6553                 | 789            | 0.0776 | $\alpha/\beta$ -H-<br>3[~87%L] $\rightarrow$ $\alpha/\beta$ -<br>L[~60%L] (54%)                                                                                 | LMCT involving phenol $\rightarrow$ Metal                                                                                                                                                                                                |
| 1.9267                 | 643            | 0.1199 | $\alpha/\beta$ -H-<br>7[~56%L] $\rightarrow$ $\alpha/\beta$ -<br>L[~60%L] (62%)                                                                                 | LMCT involving phenolate $\rightarrow$ Metal                                                                                                                                                                                             |
| 2.3310                 | 531            | 0.3499 | $\alpha/\beta$ -H-<br>11[~64%L] $\rightarrow$ $\alpha/\beta$ -<br>L[~60%L] (50%)<br>$\alpha/\beta$ -H-                                                          | LMCT involving second phenolate $\rightarrow$ Metal<br>LMCT involving phenol $\rightarrow$ Metal                                                                                                                                         |
| 3.4293                 | 361            | 0.0919 | $\alpha/\beta$ -H-20[~56%L] $\rightarrow$<br>$\alpha/\beta$ -L[~60%L] (28%)<br>$\alpha/\beta$ -H-<br>17[~74%L] $\rightarrow$ $\alpha/\beta$ -<br>L[~60%L] (42%) | MLCT involving metal $\rightarrow$ phenolate<br>Charge transfer involving <i>tert</i> -butyl $\rightarrow$ amine through metal<br>Charge transfer involving alcohol $\rightarrow$ Metal and MLCT involving Metal $\rightarrow$ phenolate |

Table S3 TD-DFT calculated electronic transitions of [<sup>1</sup>LCu<sup>II</sup>Py] (4)

| Excitation energy (eV) | $\lambda$ (nm) | $F$    | Transition              | Character                       |
|------------------------|----------------|--------|-------------------------|---------------------------------|
| 1.64                   | 754            | 0.0042 | $\beta$ -H-6[~55%L]→    | d-d transition                  |
|                        |                |        | $\beta$ -L[~51%L] (28%) |                                 |
|                        |                |        | $\beta$ -H-1[~95%L]→    | LMCT involving phenol→ Metal    |
|                        |                |        | $\beta$ -L[~51%L] (52%) |                                 |
| 1.95                   | 634            | 0.0203 | $\beta$ -H-28[~58%L]→   | LMCT involving pyridine → Metal |
|                        |                |        | $\beta$ -L[~51%L] (15%) |                                 |
|                        |                |        | $\beta$ -H-6[~55%L]→    | LMCT involving ester →Metal     |
|                        |                |        | $\beta$ -L[~51%L] (17%) |                                 |
|                        |                |        | $\beta$ -H-3[~93%L]→    | LMCT involving phenol → Metal   |
|                        |                |        | $\beta$ -L[~51%L] (26%) |                                 |
| 2.14                   | 577            | 0.0475 | $\beta$ -H-6[~55%L]→    | LMCT involving ester →Metal     |
|                        |                |        | $\beta$ -L[~51%L] (21%) |                                 |
|                        |                |        | $\beta$ -H-1[~95%L]→    | LMCT involving phenol→ Metal    |
|                        |                |        | $\beta$ -L[~51%L] (44%) |                                 |

|      |     |        |                                                                                                                                                                                                                     |                                                                                                                                                                                                                                                                                                                                       |
|------|-----|--------|---------------------------------------------------------------------------------------------------------------------------------------------------------------------------------------------------------------------|---------------------------------------------------------------------------------------------------------------------------------------------------------------------------------------------------------------------------------------------------------------------------------------------------------------------------------------|
| 2.44 | 506 | 0.018  | $\beta$ -H-17[~75%L]→<br>$\beta$ -L[~51%L] (14%)<br><br>$\beta$ -H-9[~81%L]→<br>$\beta$ -L[~51%L] (13%)<br><br>$\beta$ -H-8[~83%L]→<br>$\beta$ -L[~51%L] (15%)<br><br>$\beta$ -H[~98%L]→<br>$\beta$ -L[~51%L] (18%) | Intra ligand charge transfer involving <i>tert</i> -butyl → phenolate oxygen<br><br>Intra ligand charge transfer involving phenol → phenolate oxygen<br><br>Intra ligand charge transfer involving phenol → phenolate oxygen<br><br>LMCT involving phenol → Metal along with Intra ligand charge transfer involving phenol → pyridine |
| 3.78 | 327 | 0.0784 | $a$ -H[~98%L]→<br>$a$ -L+1[~93%L]<br>(22%)<br><br>$a$ -H[~98%L]→<br>$a$ -L+2[~100%L]<br>(37%)<br><br>$\beta$ -H[~98%L]→<br>$\beta$ -L+3[~100%L]<br>(30%)                                                            | Intra ligand charge transfer involving phenol → pyridine<br><br>Intra ligand charge transfer involving phenol → ester<br><br>Intra ligand charge transfer involving phenol → ester                                                                                                                                                    |

Table S4TD-DFT calculated electronic transitions of [<sup>2</sup>LCu<sup>II</sup>Py] (**5**)

| Excitation energy (eV) | $\lambda$ (nm) | $F$    | Transition                                                                                                                                             | Character                                                                                                                                                                                |
|------------------------|----------------|--------|--------------------------------------------------------------------------------------------------------------------------------------------------------|------------------------------------------------------------------------------------------------------------------------------------------------------------------------------------------|
| 1.3497                 | 918            | 0.0091 | $\beta$ -H[~97%L]→<br>$\beta$ -L[~52%L] (74%)                                                                                                          | Charge transfer involving phenolate → pyridine and phenol → amine and LMCT involving phenol → Metal                                                                                      |
| 1.7070                 | 726            | 0.1199 | $\beta$ -H-6[~56%L]→<br>$\beta$ -L[~52%L] (27%)<br>$\beta$ -H-1[~96%L]→<br>$\beta$ -L[~52%L] (54%)                                                     | Charge transfer involving alcohol → phenolate<br>Charge transfer involving phenol → pyridine and amine and LMCT involving phenol → Metal                                                 |
| 2.0309                 | 610            | 0.3499 | $\beta$ -H-28[~61%L]→<br>$\beta$ -L[~52%L] (17%)<br>$\beta$ -H-6[~56%L]→<br>$\beta$ -L[~52%L] (10%)<br>$\beta$ -H-4[~92%L]→<br>$\beta$ -L[~52%L] (29%) | LMCT involving <i>tert</i> -butyl → Metal<br>Charge transfer involving alcohol → phenolate<br>Charge transfer involving phenol → pyridine and amine and LMCT involving phenolate → Metal |

|        |     |        |                                                                                                                                                                                                       |                                                                                                                                                                                                                                                                                                                                                   |
|--------|-----|--------|-------------------------------------------------------------------------------------------------------------------------------------------------------------------------------------------------------|---------------------------------------------------------------------------------------------------------------------------------------------------------------------------------------------------------------------------------------------------------------------------------------------------------------------------------------------------|
| 2.1712 | 571 | 0.0308 | $\beta$ -H-6[~56%L]→<br>$\beta$ -L[~52%L] (23%)<br>$\beta$ -H-1[~96%L]→<br>$\beta$ -L[~52%L] (41%)                                                                                                    | Charge transfer involving alcohol → phenolate<br>Charge transfer involving phenol → pyridine and amine and LMCT involving phenol → Metal                                                                                                                                                                                                          |
| 2.5176 | 492 | 0.0301 | $\beta$ -H-26[~72%L]→ $\beta$ -L[~52%L]<br>(11%) $\beta$ -H-17[~76%L]→<br>$\beta$ -L[~52%L] (13%)<br>$\beta$ -H-8[~78%L]→<br>$\beta$ -L[~52%L] (21%)<br>$\beta$ -H[~97%L]→<br>$\beta$ -L[~52%L] (19%) | Charge transfer involving <i>tert</i> -butyl → pyridine and LMCT involving <i>tert</i> -butyl → Metal<br>Charge transfer involving <i>tert</i> -butyl → amine, pyridine and LMCT involving <i>tert</i> -butyl → Metal<br>LMCT involving phenol → Metal<br>Charge transfer involving phenol → amine and pyridine and LMCT involving phenol → Metal |
| 3.4193 | 362 | 0.0836 | $\beta$ -H-28[~61%L]→<br>$\beta$ -L[~52%L] (14%)<br>$\beta$ -H-5[~86%L]→<br>$\beta$ -L[~52%L] (11%)<br>$\beta$ -H-4[~92%L]→<br>$\beta$ -L[~52%L] (36%)                                                | LMCT involving <i>tert</i> -butyl → Metal<br>LMCT involving phenol → Metal<br>Charge transfer involving phenolate → pyridine and LMCT involving phenolate → Metal                                                                                                                                                                                 |
| 3.6273 | 341 | 0.0338 | $\beta$ -H-5[~86%L]→<br>$\beta$ -L[~52%L] (48%)                                                                                                                                                       | LMCT involving phenol → Metal                                                                                                                                                                                                                                                                                                                     |

Table S5 DFT-optimized Cartesian coordinates of  $[(^1L)_2Cu_2^{II}](1)$ .

|   |              |              |              |
|---|--------------|--------------|--------------|
| C | 0.231737000  | -0.594205000 | 0.432011000  |
| C | -0.009464000 | -0.060909000 | 2.859791000  |
| C | 1.004286000  | -0.187499000 | 1.708349000  |
| C | 2.006966000  | -1.306287000 | 2.075325000  |
| C | -4.011604000 | 10.760515000 | 2.317932000  |
| C | 1.762621000  | 1.130398000  | 1.456620000  |
| C | -3.231751000 | 12.290296000 | 0.471972000  |
| C | 1.540293000  | 2.297596000  | 2.186078000  |
| C | 2.744932000  | 1.202479000  | 0.448803000  |
| C | -2.997082000 | 11.864949000 | 1.940302000  |
| C | 2.827491000  | 6.754101000  | -6.000409000 |
| C | -3.265257000 | 13.086180000 | 2.838660000  |
| C | -1.130923000 | 10.222322000 | 1.357937000  |
| C | 4.685007000  | 0.936381000  | -1.635184000 |
| C | 0.806299000  | 9.794743000  | -2.253853000 |
| C | 2.242031000  | 3.483346000  | 1.917766000  |
| C | -1.561420000 | 11.325445000 | 2.101210000  |
| C | 3.490019000  | 2.344871000  | 0.142817000  |
| C | 4.971882000  | 5.486206000  | -5.810534000 |
| C | 0.541265000  | 8.483760000  | 0.688094000  |
| C | 4.267928000  | 6.817944000  | -5.460735000 |
| C | 1.920273000  | 4.717115000  | 2.712132000  |
| C | 1.981287000  | 7.383504000  | -0.939558000 |
| C | 3.161561000  | 7.152442000  | -3.146987000 |
| C | 3.223858000  | 3.542931000  | 0.891350000  |
| C | 4.234605000  | 3.345255000  | -2.064016000 |
| C | 4.570927000  | 2.316910000  | -0.959154000 |
| C | 0.160809000  | 9.699195000  | 1.484757000  |
| C | 4.995657000  | 7.982465000  | -6.171987000 |
| C | 4.306923000  | 7.035046000  | -3.935394000 |
| C | 1.684627000  | 9.882358000  | -1.004510000 |
| C | 3.241241000  | 7.328466000  | -1.758946000 |
| C | -0.617359000 | 11.892499000 | 2.973722000  |
| C | 3.285015000  | 3.952537000  | 5.544377000  |
| C | 1.106169000  | 10.282855000 | 2.377329000  |
| C | 5.947117000  | 2.637890000  | -0.330705000 |
| C | 2.612166000  | 6.527288000  | 4.187759000  |
| C | 0.695444000  | 11.427422000 | 3.136674000  |
| C | 3.873657000  | 4.348557000  | 4.189022000  |
| C | 5.541676000  | 7.125859000  | -3.267011000 |
| C | 3.087539000  | 10.442367000 | -1.225678000 |
| C | 4.494042000  | 7.373220000  | -1.102742000 |
| C | 5.690406000  | 7.300441000  | -1.885035000 |
| C | 4.523081000  | 11.656626000 | -2.655550000 |
| C | 3.680591000  | 7.356324000  | 4.846329000  |

|   |              |              |              |
|---|--------------|--------------|--------------|
| C | 1.669918000  | 12.135277000 | 4.103000000  |
| C | 1.015466000  | 13.325616000 | 4.831740000  |
| C | 5.348431000  | 4.743307000  | 4.205213000  |
| C | 3.680553000  | 7.512081000  | 6.238829000  |
| C | 2.158814000  | 11.147250000 | 5.187285000  |
| C | 3.510982000  | 7.769888000  | 9.120754000  |
| C | 4.625153000  | 8.033118000  | 4.039560000  |
| C | 2.870900000  | 12.688198000 | 3.300908000  |
| C | 7.099767000  | 7.442989000  | -1.264523000 |
| C | 7.360705000  | 6.330319000  | -0.226674000 |
| C | 8.218399000  | 7.338639000  | -2.321732000 |
| C | 4.620478000  | 8.316310000  | 6.884311000  |
| C | 7.225287000  | 8.833455000  | -0.601618000 |
| C | 4.648297000  | 8.526686000  | 8.411071000  |
| C | 5.630374000  | 8.833415000  | 4.670574000  |
| C | 7.387613000  | 4.703937000  | 5.396908000  |
| C | 5.577701000  | 8.944093000  | 6.066217000  |
| C | 4.494742000  | 10.031838000 | 8.730944000  |
| C | 5.993082000  | 8.017954000  | 8.980652000  |
| C | 6.181334000  | 10.529404000 | 2.853105000  |
| C | 6.760631000  | 9.527491000  | 3.874994000  |
| C | 7.607234000  | 8.454745000  | 3.153173000  |
| C | 7.715566000  | 10.323791000 | 4.788536000  |
| H | -0.313430000 | -1.540030000 | 0.590316000  |
| H | -0.528444000 | -1.020844000 | 3.010740000  |
| H | -0.501163000 | 0.179663000  | 0.153141000  |
| H | 0.906291000  | -0.738355000 | -0.425707000 |
| H | 1.480590000  | -2.259529000 | 2.251481000  |
| H | -0.777519000 | 0.700000000  | 2.649135000  |
| H | -5.046745000 | 11.123480000 | 2.200999000  |
| H | 2.742737000  | -1.476934000 | 1.274620000  |
| H | 0.480606000  | 0.202452000  | 3.810573000  |
| H | -3.898608000 | 9.867431000  | 1.683974000  |
| H | -4.256126000 | 12.676132000 | 0.335445000  |
| H | 2.564252000  | -1.050790000 | 2.990946000  |
| H | -3.099377000 | 11.447603000 | -0.224305000 |
| H | -3.877211000 | 10.444750000 | 3.364822000  |
| H | 0.799026000  | 2.316834000  | 2.987485000  |
| H | 2.259457000  | 5.921730000  | -5.556258000 |
| H | 2.941576000  | 0.298768000  | -0.126312000 |
| H | 2.842542000  | 6.597946000  | -7.090727000 |
| H | -4.299703000 | 13.436774000 | 2.694369000  |
| H | -1.814155000 | 9.734164000  | 0.656021000  |
| H | -2.526574000 | 13.083192000 | 0.175096000  |
| H | 3.749564000  | 0.637432000  | -2.134230000 |
| H | 2.273978000  | 7.687261000  | -5.809638000 |



|   |              |              |              |
|---|--------------|--------------|--------------|
| H | -0.176458000 | 9.370741000  | -2.000006000 |
| H | -0.310774000 | 8.176410000  | 0.055583000  |
| H | 1.107414000  | 7.197425000  | -1.586419000 |
| H | 2.170472000  | 7.089165000  | -3.598751000 |
| H | 4.959458000  | 5.314877000  | -6.899940000 |
| H | 4.468677000  | 4.635799000  | -5.324168000 |
| H | 3.270893000  | 3.099500000  | -2.540253000 |
| H | -3.143819000 | 12.844888000 | 3.906139000  |
| H | 4.963679000  | 0.143236000  | -0.923328000 |
| H | 1.262699000  | 9.189552000  | -3.046346000 |
| H | 1.142217000  | 4.481172000  | 3.459936000  |
| H | 0.637839000  | 10.801750000 | -2.658579000 |
| H | -2.594879000 | 13.926874000 | 2.600953000  |
| H | 1.504135000  | 5.507696000  | 2.065862000  |
| H | 0.764147000  | 7.631268000  | 1.350592000  |
| H | 5.470471000  | 0.974358000  | -2.406545000 |
| H | 2.002877000  | 6.576799000  | -0.191150000 |
| H | 4.981569000  | 7.838301000  | -7.265231000 |
| H | 2.220824000  | 3.695069000  | 5.438230000  |
| H | 5.010762000  | 3.328354000  | -2.847263000 |
| H | 6.023186000  | 5.482017000  | -5.484508000 |
| H | 4.172171000  | 4.363735000  | -1.662361000 |
| H | 4.508949000  | 8.945782000  | -5.949657000 |
| H | 1.233679000  | 10.634206000 | -0.333369000 |
| H | -0.919566000 | 12.757194000 | 3.558024000  |
| H | 1.886868000  | 6.184595000  | 4.944712000  |
| H | 2.057521000  | 7.155960000  | 3.474472000  |
| H | 3.875551000  | 3.446663000  | 3.551949000  |
| H | 6.048806000  | 8.059289000  | -5.861365000 |
| H | 6.221274000  | 1.871400000  | 0.412950000  |
| H | 3.804450000  | 3.063406000  | 5.926286000  |
| H | 3.388036000  | 4.745781000  | 6.294584000  |
| H | 6.730599000  | 2.647035000  | -1.107347000 |
| H | 5.940562000  | 3.615816000  | 0.165280000  |
| H | 6.444209000  | 7.056045000  | -3.871121000 |
| H | 0.158757000  | 13.014655000 | 5.450542000  |
| H | 2.907778000  | 6.997009000  | 6.811018000  |
| H | 4.452680000  | 12.085659000 | -3.661646000 |
| H | 0.671582000  | 14.107444000 | 4.136097000  |
| H | 1.309020000  | 10.782552000 | 5.787989000  |
| H | 2.519578000  | 8.104781000  | 8.777487000  |
| H | 3.578723000  | 6.681756000  | 8.963339000  |
| H | 5.322732000  | 10.905127000 | -2.607595000 |
| H | 7.304979000  | 5.336954000  | -0.695654000 |
| H | 2.533921000  | 13.442272000 | 2.570434000  |
| H | 2.667398000  | 10.281713000 | 4.746327000  |

|    |             |              |              |
|----|-------------|--------------|--------------|
| H  | 4.714949000 | 12.440636000 | -1.909553000 |
| H  | 6.639142000 | 6.358266000  | 0.597501000  |
| H  | 3.390128000 | 11.888989000 | 2.758656000  |
| H  | 3.562527000 | 7.948943000  | 10.206408000 |
| H  | 8.224708000 | 6.360954000  | -2.828780000 |
| H  | 1.754493000 | 13.788901000 | 5.504603000  |
| H  | 8.145812000 | 8.125011000  | -3.089543000 |
| H  | 2.862247000 | 11.650760000 | 5.871268000  |
| H  | 6.463609000 | 8.985388000  | 0.170950000  |
| H  | 7.116950000 | 9.632914000  | -1.352613000 |
| H  | 3.593730000 | 13.176060000 | 3.976805000  |
| H  | 5.529179000 | 10.040757000 | 2.120509000  |
| H  | 8.367456000 | 6.445874000  | 0.207127000  |
| H  | 3.541778000 | 10.422102000 | 8.340334000  |
| H  | 6.124214000 | 6.942496000  | 8.779301000  |
| H  | 7.919997000 | 4.163195000  | 4.601861000  |
| H  | 9.194602000 | 7.456253000  | -1.825791000 |
| H  | 6.999461000 | 7.846365000  | 2.474392000  |
| H  | 7.714524000 | 4.362877000  | 6.385883000  |
| H  | 7.558040000 | 5.782845000  | 5.280936000  |
| H  | 5.597954000 | 11.312620000 | 3.359286000  |
| H  | 8.218071000 | 8.944748000  | -0.135550000 |
| H  | 4.512807000 | 10.199575000 | 9.820807000  |
| H  | 6.034083000 | 8.167089000  | 10.072572000 |
| H  | 6.329781000 | 9.558839000  | 6.556935000  |
| H  | 6.998425000 | 11.018532000 | 2.298139000  |
| H  | 5.306282000 | 10.629693000 | 8.289008000  |
| H  | 6.851320000 | 8.548684000  | 8.540804000  |
| H  | 8.085057000 | 7.780554000  | 3.882624000  |
| H  | 8.408529000 | 8.933162000  | 2.566490000  |
| H  | 7.201141000 | 11.136347000 | 5.325261000  |
| H  | 8.217049000 | 9.683317000  | 5.530985000  |
| H  | 8.502455000 | 10.785559000 | 4.171674000  |
| N  | 1.764524000 | 8.650284000  | -0.167523000 |
| N  | 3.098140000 | 5.348575000  | 3.399046000  |
| O  | 3.861700000 | 4.674917000  | 0.619637000  |
| O  | 3.244373000 | 11.033085000 | -2.411654000 |
| O  | 2.321963000 | 9.766675000  | 2.513935000  |
| O  | 4.522589000 | 7.515810000  | 0.236489000  |
| O  | 3.946161000 | 10.433812000 | -0.362510000 |
| O  | 4.568700000 | 7.878071000  | 2.702821000  |
| O  | 5.916188000 | 5.221183000  | 3.239726000  |
| O  | 5.973611000 | 4.420470000  | 5.338928000  |
| Cu | 4.269338000 | 6.132007000  | 1.782271000  |
| Cu | 3.364710000 | 8.785114000  | 1.255128000  |

Table S6 DFT-optimized Cartesian coordinates of  $[(^2L)_2Cu_2^{II}]$  (2)

|    |              |              |              |
|----|--------------|--------------|--------------|
| Cu | 0.095907000  | 0.020723000  | -0.066698000 |
| Cu | -0.031481000 | 0.019128000  | 2.754725000  |
| O  | 1.769076000  | 0.187484000  | -0.969255000 |
| O  | -1.427362000 | -0.217076000 | 1.235329000  |
| O  | 0.858080000  | -1.204294000 | 1.451687000  |
| N  | -0.667310000 | 1.861143000  | -0.760045000 |
| C  | 2.088305000  | 1.044627000  | -1.934427000 |
| C  | 0.536590000  | 2.749812000  | -0.902800000 |
| H  | 1.018826000  | 2.755399000  | 0.089389000  |
| C  | -1.529497000 | 2.436918000  | 0.322183000  |
| H  | 0.194724000  | -2.676632000 | -0.345215000 |
| O  | -1.086167000 | 1.262630000  | 3.758024000  |
| N  | 1.813215000  | 0.752166000  | 3.483055000  |
| C  | -0.688012000 | 2.133707000  | 4.680854000  |
| C  | 1.603486000  | 2.234054000  | 3.606847000  |
| H  | 1.268954000  | 2.569526000  | 2.610516000  |
| C  | 2.840445000  | 0.520926000  | 2.415920000  |
| H  | -2.062805000 | -1.782198000 | 3.023484000  |
| O  | 0.244538000  | -1.371604000 | 4.716368000  |
| C  | -2.656723000 | 0.322804000  | 1.094818000  |
| C  | 2.086739000  | -1.740570000 | 1.619878000  |
| C  | -1.369859000 | 1.708599000  | -2.060300000 |
| C  | 3.042917000  | 0.701608000  | -2.951845000 |
| C  | 1.512021000  | 2.341905000  | -1.969722000 |
| H  | 0.191568000  | 3.781912000  | -1.097820000 |
| H  | -0.895186000 | 2.510462000  | 1.219273000  |
| H  | -1.807557000 | 3.466681000  | 0.032300000  |
| C  | -2.773055000 | 1.656676000  | 0.640838000  |
| C  | 0.616803000  | -3.687090000 | -0.399037000 |
| C  | -2.172460000 | 0.420787000  | -2.211173000 |
| C  | 2.184559000  | 0.141557000  | 4.787247000  |
| C  | -1.586302000 | 2.581469000  | 5.709561000  |
| C  | 0.632017000  | 2.658103000  | 4.673407000  |
| H  | 2.580733000  | 2.716363000  | 3.792263000  |
| H  | 2.471235000  | 1.022541000  | 1.508178000  |
| H  | 3.774281000  | 1.028599000  | 2.718754000  |

|   |              |              |              |
|---|--------------|--------------|--------------|
| C | 3.128025000  | -0.921367000 | 2.113080000  |
| C | -3.093843000 | -2.153214000 | 3.043688000  |
| C | 1.647110000  | -1.276680000 | 4.989880000  |
| C | -3.847130000 | -0.434988000 | 1.323590000  |
| C | 2.352227000  | -3.122615000 | 1.371458000  |
| H | -0.595325000 | 1.720318000  | -2.838793000 |
| H | -2.036020000 | 2.572894000  | -2.242049000 |
| C | 3.694213000  | -0.697332000 | -2.999969000 |
| C | 3.362101000  | 1.674659000  | -3.903846000 |
| C | 1.861292000  | 3.266659000  | -2.964560000 |
| C | -4.025873000 | 2.257355000  | 0.476017000  |
| C | 1.246388000  | -4.114649000 | 0.944273000  |
| H | 1.366556000  | -3.697287000 | -1.203724000 |
| H | -0.191421000 | -4.383191000 | -0.678770000 |
| H | -2.508988000 | 0.356439000  | -3.262275000 |
| H | -3.060062000 | 0.412096000  | -1.564309000 |
| H | 1.771165000  | 0.787200000  | 5.575419000  |
| H | 3.282816000  | 0.136864000  | 4.912360000  |
| C | -3.027969000 | 2.035743000  | 5.805132000  |
| C | -1.116817000 | 3.531144000  | 6.622456000  |
| C | 1.045273000  | 3.597728000  | 5.629685000  |
| C | 4.414329000  | -1.432192000 | 2.318319000  |
| C | -3.814401000 | -1.935652000 | 1.695571000  |
| H | -3.628589000 | -1.638591000 | 3.855984000  |
| H | -3.058707000 | -3.227353000 | 3.288183000  |
| H | 1.866842000  | -1.589462000 | 6.026580000  |
| H | 2.125720000  | -1.994270000 | 4.313327000  |
| C | -5.072519000 | 0.223795000  | 1.146959000  |
| C | 3.663152000  | -3.571996000 | 1.583677000  |
| C | 4.459788000  | -0.974316000 | -1.685464000 |
| C | 2.593841000  | -1.762590000 | -3.212664000 |
| C | 4.702841000  | -0.837792000 | -4.157473000 |
| H | 4.091713000  | 1.414572000  | -4.669230000 |
| C | 2.799075000  | 2.964973000  | -3.951912000 |
| H | 1.378687000  | 4.245630000  | -2.939902000 |
| C | -5.208935000 | 1.562929000  | 0.739777000  |
| H | -4.053647000 | 3.292289000  | 0.131724000  |
| C | 0.168569000  | -4.175645000 | 2.051269000  |

|   |              |              |              |
|---|--------------|--------------|--------------|
| C | 1.785384000  | -5.546746000 | 0.750072000  |
| C | -3.809672000 | 2.373184000  | 4.514606000  |
| C | -2.988311000 | 0.503815000  | 6.016243000  |
| C | -3.808332000 | 2.640276000  | 6.989119000  |
| H | -1.802768000 | 3.876239000  | 7.394641000  |
| C | 0.184560000  | 4.069191000  | 6.620837000  |
| H | 2.073297000  | 3.960446000  | 5.570754000  |
| C | 4.720186000  | -2.767632000 | 2.045486000  |
| H | 5.180741000  | -0.751892000 | 2.692780000  |
| C | -3.093540000 | -2.721715000 | 0.574984000  |
| C | -5.227921000 | -2.536993000 | 1.835416000  |
| H | -5.984801000 | -0.340598000 | 1.330276000  |
| H | 3.878320000  | -4.620419000 | 1.387178000  |
| H | 4.926580000  | -1.973039000 | -1.719889000 |
| H | 3.793439000  | -0.935321000 | -0.815517000 |
| H | 5.263019000  | -0.232390000 | -1.542525000 |
| H | 3.033712000  | -2.774430000 | -3.210001000 |
| H | 2.093302000  | -1.615281000 | -4.183681000 |
| H | 1.834787000  | -1.711478000 | -2.423463000 |
| H | 5.130029000  | -1.853123000 | -4.144167000 |
| H | 5.540858000  | -0.128245000 | -4.068985000 |
| H | 4.232480000  | -0.693786000 | -5.142985000 |
| C | 3.220511000  | 3.955487000  | -5.054992000 |
| C | -6.609433000 | 2.187928000  | 0.586189000  |
| H | 0.604406000  | -4.531582000 | 2.998802000  |
| H | -0.632584000 | -4.877559000 | 1.765813000  |
| H | -0.282874000 | -3.193568000 | 2.231904000  |
| H | 2.212100000  | -5.962395000 | 1.676167000  |
| H | 2.551977000  | -5.600472000 | -0.038773000 |
| H | 0.956968000  | -6.206573000 | 0.447804000  |
| H | -4.835554000 | 1.972653000  | 4.573722000  |
| H | -3.324818000 | 1.950052000  | 3.626654000  |
| H | -3.881978000 | 3.465443000  | 4.383530000  |
| H | -4.010695000 | 0.097874000  | 6.095692000  |
| H | -2.459157000 | 0.253022000  | 6.951455000  |
| H | -2.491773000 | 0.003505000  | 5.175485000  |
| H | -4.823135000 | 2.212371000  | 7.011548000  |
| H | -3.916404000 | 3.732775000  | 6.901440000  |

|   |              |              |              |
|---|--------------|--------------|--------------|
| H | -3.336488000 | 2.418662000  | 7.959589000  |
| C | 0.592871000  | 5.117163000  | 7.674784000  |
| C | 6.125019000  | -3.371023000 | 2.239050000  |
| H | -3.621177000 | -2.592180000 | -0.386534000 |
| H | -3.085934000 | -3.799974000 | 0.802447000  |
| H | -2.052157000 | -2.394487000 | 0.469518000  |
| H | -5.805999000 | -2.471679000 | 0.900235000  |
| H | -5.809651000 | -2.051715000 | 2.634454000  |
| H | -5.143184000 | -3.603854000 | 2.095193000  |
| C | 2.908849000  | 3.354086000  | -6.445131000 |
| C | 4.737819000  | 4.234766000  | -4.949938000 |
| C | 2.478381000  | 5.299510000  | -4.941037000 |
| C | -6.539988000 | 3.662874000  | 0.150480000  |
| C | -7.412899000 | 1.408185000  | -0.480623000 |
| C | -7.357616000 | 2.122233000  | 1.937955000  |
| C | 0.429478000  | 4.524893000  | 9.093666000  |
| C | -0.307807000 | 6.366855000  | 7.537325000  |
| C | 2.056956000  | 5.563182000  | 7.509609000  |
| C | 7.138926000  | -2.327140000 | 2.741635000  |
| C | 6.060551000  | -4.517707000 | 3.274588000  |
| C | 6.639061000  | -3.928555000 | 0.891166000  |
| H | 3.209521000  | 4.049396000  | -7.246965000 |
| H | 1.830983000  | 3.153354000  | -6.554498000 |
| H | 3.442367000  | 2.405688000  | -6.610769000 |
| H | 5.060694000  | 4.938165000  | -5.735968000 |
| H | 5.330570000  | 3.314214000  | -5.062670000 |
| H | 4.989992000  | 4.675647000  | -3.972246000 |
| H | 2.805258000  | 5.978591000  | -5.744662000 |
| H | 2.681231000  | 5.801521000  | -3.981833000 |
| H | 1.388039000  | 5.175625000  | -5.037290000 |
| H | -7.557778000 | 4.074127000  | 0.059328000  |
| H | -6.048759000 | 3.780524000  | -0.828327000 |
| H | -5.997534000 | 4.281535000  | 0.882434000  |
| H | -7.531930000 | 0.347850000  | -0.210341000 |
| H | -6.911621000 | 1.449571000  | -1.461120000 |
| H | -8.422078000 | 1.837370000  | -0.596490000 |
| H | -7.485288000 | 1.085977000  | 2.286297000  |
| H | -8.362039000 | 2.568391000  | 1.846531000  |

|   |              |              |              |
|---|--------------|--------------|--------------|
| H | -6.808920000 | 2.672055000  | 2.718727000  |
| H | 0.711696000  | 5.265741000  | 9.860565000  |
| H | 1.069867000  | 3.637973000  | 9.225664000  |
| H | -0.609012000 | 4.219521000  | 9.293584000  |
| H | -0.034814000 | 7.129159000  | 8.286412000  |
| H | -1.370905000 | 6.121759000  | 7.683541000  |
| H | -0.204265000 | 6.818442000  | 6.537748000  |
| H | 2.310189000  | 6.312704000  | 8.276289000  |
| H | 2.237277000  | 6.023562000  | 6.525446000  |
| H | 2.758160000  | 4.721719000  | 7.626769000  |
| H | 8.129040000  | -2.794581000 | 2.862548000  |
| H | 6.850631000  | -1.910350000 | 3.719734000  |
| H | 7.252661000  | -1.491438000 | 2.033458000  |
| H | 5.380257000  | -5.321640000 | 2.954501000  |
| H | 5.706261000  | -4.148988000 | 4.250685000  |
| H | 7.058103000  | -4.964581000 | 3.421016000  |
| H | 5.981208000  | -4.717843000 | 0.496678000  |
| H | 7.645584000  | -4.363063000 | 1.010874000  |
| H | 6.697527000  | -3.132323000 | 0.132438000  |
| O | -1.315576000 | -0.688387000 | -1.901806000 |
| H | -1.864043000 | -1.445043000 | -1.644700000 |
| H | -0.252952000 | -0.847735000 | 5.366460000  |

Table S7 DFT-optimized Cartesian coordinates of [<sup>1</sup>L<sub>2</sub>Cu<sup>II</sup>Py] (4)

|   |              |              |              |
|---|--------------|--------------|--------------|
| C | 0.302917000  | -0.330796000 | -0.061297000 |
| C | -0.240912000 | 0.270884000  | 2.299383000  |
| C | 0.915238000  | 0.044792000  | 1.308179000  |
| C | 1.766350000  | -1.138048000 | 1.825828000  |
| C | 1.802079000  | 1.296315000  | 1.157244000  |
| C | 1.586892000  | 2.482204000  | 1.858510000  |
| C | 2.902470000  | 1.285400000  | 0.277562000  |
| C | 5.019645000  | 0.883524000  | -1.611777000 |
| C | 2.414591000  | 3.603027000  | 1.693173000  |
| C | 3.769254000  | 2.362847000  | 0.074747000  |
| C | 2.088440000  | 4.866396000  | 2.436443000  |
| C | 3.525923000  | 3.577460000  | 0.807410000  |

|   |              |              |              |
|---|--------------|--------------|--------------|
| C | 4.794111000  | 3.322108000  | -2.025841000 |
| C | 4.949888000  | 2.256590000  | -0.914727000 |
| C | 3.119781000  | 3.938310000  | 5.334745000  |
| C | 6.283009000  | 2.446800000  | -0.151439000 |
| C | 2.693175000  | 6.596168000  | 4.039757000  |
| C | 3.885000000  | 4.390392000  | 4.089957000  |
| C | 3.731753000  | 7.383917000  | 4.784872000  |
| C | 5.340835000  | 4.790756000  | 4.328544000  |
| C | 3.668777000  | 7.521221000  | 6.177849000  |
| C | 3.402638000  | 7.710391000  | 9.062057000  |
| C | 4.710601000  | 8.068939000  | 4.017394000  |
| C | 4.569397000  | 8.329518000  | 6.873849000  |
| C | 4.541730000  | 8.510584000  | 8.404553000  |
| C | 5.641538000  | 8.918613000  | 4.707019000  |
| C | 7.159680000  | 4.820479000  | 5.833120000  |
| C | 5.532820000  | 9.006928000  | 6.099073000  |
| C | 4.338349000  | 10.003945000 | 8.751826000  |
| C | 5.879562000  | 8.025727000  | 9.010231000  |
| C | 5.982240000  | 10.730997000 | 2.989771000  |
| C | 6.698806000  | 9.739237000  | 3.936883000  |
| C | 7.621322000  | 8.798416000  | 3.127640000  |
| C | 7.598946000  | 10.569792000 | 4.872705000  |
| H | -0.332585000 | -1.228024000 | 0.028706000  |
| H | -0.853523000 | -0.641596000 | 2.377229000  |
| H | -0.318912000 | 0.490164000  | -0.452604000 |
| H | 1.078773000  | -0.547576000 | -0.811514000 |
| H | 1.149359000  | -2.046241000 | 1.933165000  |
| H | -0.904869000 | 1.088060000  | 1.975814000  |
| H | 2.593578000  | -1.376547000 | 1.139793000  |
| H | 0.125146000  | 0.509186000  | 3.310680000  |
| H | 2.205302000  | -0.905942000 | 2.809480000  |
| H | 0.750923000  | 2.569040000  | 2.555385000  |
| H | 3.091078000  | 0.368681000  | -0.279925000 |
| H | 4.115789000  | 0.672510000  | -2.204625000 |
| H | 3.886580000  | 3.124985000  | -2.619407000 |
| H | 5.162205000  | 0.057843000  | -0.896939000 |



|   |             |              |              |
|---|-------------|--------------|--------------|
| H | 1.214838000 | 4.691815000  | 3.089374000  |
| H | 1.806497000 | 5.673949000  | 1.738913000  |
| H | 5.877014000 | 0.869419000  | -2.303879000 |
| H | 2.082816000 | 3.681083000  | 5.073230000  |
| H | 5.656989000 | 3.292282000  | -2.713529000 |
| H | 4.710813000 | 4.331520000  | -1.605234000 |
| H | 1.907724000 | 6.246870000  | 4.731314000  |
| H | 2.205514000 | 7.245480000  | 3.295157000  |
| H | 3.974661000 | 3.520768000  | 3.417634000  |
| H | 6.446652000 | 1.612321000  | 0.549709000  |
| H | 3.590264000 | 3.036677000  | 5.749992000  |
| H | 3.112166000 | 4.700264000  | 6.123494000  |
| H | 7.133962000 | 2.464603000  | -0.853981000 |
| H | 6.284704000 | 3.376445000  | 0.431709000  |
| H | 2.877738000 | 6.989745000  | 6.710104000  |
| H | 2.413824000 | 8.029536000  | 8.696577000  |
| H | 3.501307000 | 6.628665000  | 8.879557000  |
| H | 3.416809000 | 7.863915000  | 10.153010000 |
| H | 5.317900000 | 10.203531000 | 2.294271000  |
| H | 3.387568000 | 10.377408000 | 8.339295000  |
| H | 6.042978000 | 6.957149000  | 8.795765000  |
| H | 7.824884000 | 4.270965000  | 5.151961000  |
| H | 7.047216000 | 8.168549000  | 2.438345000  |
| H | 7.329429000 | 4.514164000  | 6.871855000  |
| H | 7.326304000 | 5.900047000  | 5.714399000  |
| H | 5.373737000 | 11.446691000 | 3.566151000  |
| H | 4.317694000 | 10.150214000 | 9.844958000  |
| H | 5.884202000 | 8.157118000  | 10.105449000 |
| H | 6.238483000 | 9.649053000  | 6.624800000  |
| H | 6.719108000 | 11.307477000 | 2.404487000  |
| H | 5.146382000 | 10.632588000 | 8.347694000  |
| H | 6.737595000 | 8.583561000  | 8.604660000  |
| H | 8.187051000 | 8.135593000  | 3.802308000  |
| H | 8.350573000 | 9.386128000  | 2.544326000  |
| H | 7.027702000 | 11.306156000 | 5.459687000  |
| H | 8.164784000 | 9.936489000  | 5.574243000  |

|    |             |              |              |
|----|-------------|--------------|--------------|
| H  | 8.332468000 | 11.129569000 | 4.270689000  |
| N  | 3.215518000 | 5.432260000  | 3.254540000  |
| O  | 4.306183000 | 4.637412000  | 0.658712000  |
| O  | 4.718134000 | 7.930602000  | 2.699290000  |
| O  | 6.052905000 | 5.245665000  | 3.452556000  |
| O  | 5.780626000 | 4.501735000  | 5.556810000  |
| Cu | 4.551981000 | 6.202043000  | 1.796781000  |
| C  | 5.358132000 | 8.376895000  | -0.109281000 |
| C  | 6.433228000 | 6.380247000  | -0.555981000 |
| C  | 5.984868000 | 9.007386000  | -1.183407000 |
| H  | 4.670298000 | 8.905605000  | 0.551186000  |
| C  | 7.118052000 | 6.938900000  | -1.635194000 |
| H  | 6.559401000 | 5.335511000  | -0.276329000 |
| C  | 6.886522000 | 8.276536000  | -1.959553000 |
| H  | 5.769699000 | 10.056202000 | -1.395942000 |
| H  | 7.814646000 | 6.325287000  | -2.209183000 |
| H  | 7.401239000 | 8.742697000  | -2.803462000 |
| N  | 5.574961000 | 7.087872000  | 0.192042000  |

Table S8 DFT-optimized Cartesian coordinates of [<sup>2</sup>L<sub>2</sub>Cu<sup>II</sup>Py] (**5**)

|    |              |              |              |
|----|--------------|--------------|--------------|
| Cu | 0.041552000  | -0.087596000 | -0.048478000 |
| O  | 0.033202000  | -0.139601000 | 1.892307000  |
| O  | 0.313674000  | -0.126051000 | -1.992691000 |
| N  | -1.917872000 | -0.803374000 | -0.189027000 |
| C  | -0.932997000 | -0.490214000 | 2.730398000  |
| C  | -2.031521000 | -1.838294000 | 0.896050000  |
| H  | -1.195799000 | -2.538625000 | 0.722958000  |
| C  | -2.063299000 | -1.514903000 | -1.498678000 |
| H  | 2.106987000  | -0.039214000 | -3.574496000 |
| C  | -0.642980000 | -0.002006000 | -2.905585000 |
| C  | -2.904731000 | 0.289201000  | 0.008242000  |
| C  | -0.921963000 | -0.058727000 | 4.102363000  |
| C  | -2.007137000 | -1.314666000 | 2.304154000  |
| H  | -2.965641000 | -2.408038000 | 0.738474000  |
| H  | -1.308389000 | -2.318384000 | -1.480593000 |
| H  | -3.057709000 | -1.997936000 | -1.523280000 |

|   |              |              |              |
|---|--------------|--------------|--------------|
| C | -1.881199000 | -0.671705000 | -2.727175000 |
| C | -2.571857000 | 1.607351000  | -0.686106000 |
| C | 2.013956000  | 0.580811000  | -4.473999000 |
| C | -0.472883000 | 0.798965000  | -4.084806000 |
| H | -2.957104000 | 0.471474000  | 1.090036000  |
| H | -3.910050000 | -0.041176000 | -0.317170000 |
| C | 0.206625000  | 0.845978000  | 4.641272000  |
| C | -1.959741000 | -0.485608000 | 4.935554000  |
| C | -3.027982000 | -1.695967000 | 3.187132000  |
| C | -2.904118000 | -0.582197000 | -3.677844000 |
| H | -3.304923000 | 2.358229000  | -0.337692000 |
| H | -2.660520000 | 1.524237000  | -1.776716000 |
| C | 0.837679000  | 1.575824000  | -4.341836000 |
| H | 1.860072000  | -0.085955000 | -5.337647000 |
| H | 2.963319000  | 1.121483000  | -4.628314000 |
| C | -1.530577000 | 0.847720000  | -5.001600000 |
| C | 1.568109000  | 0.125365000  | 4.492717000  |
| C | 0.203094000  | 2.187918000  | 3.869588000  |
| C | 0.036200000  | 1.183885000  | 6.135746000  |
| H | -1.944114000 | -0.161112000 | 5.975197000  |
| C | -3.031496000 | -1.301827000 | 4.525084000  |
| H | -3.827530000 | -2.327788000 | 2.794854000  |
| C | -2.756591000 | 0.173302000  | -4.844385000 |
| H | -3.829961000 | -1.126982000 | -3.483268000 |
| C | 1.106011000  | 2.560240000  | -3.178000000 |
| C | 0.788380000  | 2.406145000  | -5.639660000 |
| H | -1.398881000 | 1.449617000  | -5.899632000 |
| H | 2.390997000  | 0.782094000  | 4.824602000  |
| H | 1.752446000  | -0.177033000 | 3.454738000  |
| H | 1.591209000  | -0.781635000 | 5.118588000  |
| H | 1.067219000  | 2.808630000  | 4.163382000  |
| H | -0.711051000 | 2.759539000  | 4.097623000  |
| H | 0.229594000  | 2.030400000  | 2.783837000  |
| H | 0.866224000  | 1.832434000  | 6.459555000  |
| H | 0.055887000  | 0.284394000  | 6.771028000  |
| H | -0.900927000 | 1.726303000  | 6.336996000  |

|   |              |              |              |
|---|--------------|--------------|--------------|
| C | -4.123138000 | -1.713262000 | 5.532260000  |
| C | -3.848698000 | 0.285142000  | -5.926756000 |
| H | 0.291255000  | 3.301975000  | -3.104145000 |
| H | 2.040536000  | 3.119915000  | -3.350409000 |
| H | 1.199176000  | 2.027125000  | -2.222905000 |
| H | -0.014236000 | 3.160418000  | -5.622182000 |
| H | 0.646814000  | 1.776030000  | -6.531437000 |
| H | 1.741964000  | 2.943116000  | -5.766594000 |
| C | -4.806978000 | -0.452855000 | 6.110824000  |
| C | -3.486519000 | -2.521167000 | 6.687075000  |
| C | -5.210219000 | -2.588142000 | 4.881632000  |
| C | -5.112359000 | -0.513133000 | -5.557687000 |
| C | -4.254407000 | 1.765916000  | -6.111916000 |
| C | -3.308030000 | -0.265616000 | -7.267099000 |
| H | -5.587924000 | -0.732383000 | 6.838138000  |
| H | -5.280795000 | 0.139945000  | 5.312085000  |
| H | -4.089213000 | 0.200791000  | 6.629651000  |
| H | -4.252123000 | -2.821207000 | 7.422537000  |
| H | -2.722239000 | -1.936370000 | 7.221723000  |
| H | -3.001221000 | -3.434130000 | 6.306686000  |
| H | -5.971917000 | -2.859548000 | 5.630006000  |
| H | -4.795776000 | -3.525194000 | 4.477537000  |
| H | -5.725172000 | -2.061806000 | 4.062227000  |
| H | -5.867333000 | -0.410668000 | -6.353403000 |
| H | -5.567652000 | -0.151721000 | -4.622013000 |
| H | -4.899324000 | -1.587324000 | -5.441077000 |
| H | -3.399958000 | 2.390392000  | -6.414569000 |
| H | -4.658252000 | 2.183716000  | -5.175613000 |
| H | -5.029706000 | 1.863581000  | -6.890372000 |
| H | -2.422323000 | 0.291027000  | -7.609415000 |
| H | -4.074549000 | -0.192011000 | -8.056907000 |
| H | -3.019074000 | -1.324214000 | -7.169275000 |
| O | -1.246589000 | 2.023554000  | -0.322719000 |
| H | -0.834002000 | 2.438347000  | -1.094946000 |
| C | 2.938260000  | -0.394733000 | -0.780602000 |
| C | 2.649776000  | 1.023581000  | 1.021656000  |

|   |             |              |              |
|---|-------------|--------------|--------------|
| C | 4.325234000 | -0.265314000 | -0.719164000 |
| H | 2.444939000 | -1.004654000 | -1.538406000 |
| C | 4.025165000 | 1.224134000  | 1.140543000  |
| H | 1.940878000 | 1.493138000  | 1.701802000  |
| C | 4.880783000 | 0.563903000  | 0.257325000  |
| H | 4.951484000 | -0.804366000 | -1.432417000 |
| H | 4.409384000 | 1.883306000  | 1.921015000  |
| H | 5.963660000 | 0.693078000  | 0.328721000  |
| N | 2.119537000 | 0.234596000  | 0.076106000  |
